# Supplementary material for: Defining morphologically and genetically distinct GABAergic/cholinergic amacrine cell subtypes in the vertebrate retina
Source: PLoS Biol. 2024 Feb 16;22(2):e3002506. doi: 10.1371/journal.pbio.3002506 (PMC10914270; doi:10.1371/journal.pbio.3002506)
Supplement: S3 Data — (XLSX) [file pbio.3002506.s011.xlsx]

## Sheet: Fig 2
Fig 2F
	bhlhe22+ ACs		bhlhe23+ ACs
	bhlhe22+ /bhlhe23+ AC	bhlhe22+ /bhlhe23- ACs	bhlhe22+ /bhlhe23+ AC	bhlhe22- /bhlhe23+ ACs
Fish 1	0.875	0.125	1	0
Fish 2	0.846154	0.153846	0.916667	0.0833333
Fish 3	0.933333	0.0666667	0.933333	0.0666667
Fish 4	1	0	1	0
Fish 5	0.9375	0.0625	1	0
Fish 6	0.888889	0.111111	1	0
Fish 7	1	0	1	0
Fish 8	0.888889	0.111111	1	0
	0.921221	0.0787794	0.98125	0.01875
Fig 2H
	anti-sox2 overlapping with TgBAC(sox2:mNeonGreen)			anti-sox2 non-overlapping with TgBAC(sox2:mNeonGreen)
Fish 1	0.933333			0.0666667
Fish 2	0.896552			0.103448
Fish 3	0.954545			0.0454545
	0.928144			0.0718565
Fig 2L	TgBAC(bhlhe22:mNeonGreen):: anti-Gad65/67::anti-ChAT, in area of 100×100 μm2 maximum radian, single section
cell number	bhlhe22+ChAT+Gad65/67+	bhlhe22+ChAT+Gad65/67-	bhlhe22+ChAT-Gad65/67+	bhlhe22+ChAT-Gad65/67-
Fish 1	8	0	0	2
Fish 2	5	0	0	0
Fish 3	11	0	0	2
Fish 4	13	0	1	0
Fish 5	10	1	0	0
Fish 6	8	0	0	0
Fig 2M	TgBAC(sox2:mNeonGreen)::anti-Gad65/67::anti-ChAT, in area of 100×100 μm2 maximum radian, single section
cell number	sox2+ChAT+Gad65/67+	sox2+ChAT+Gad65/67-	sox2+ChAT-Gad65/67+	sox2+ChAT-Gad65/67-
Fish 1	23	1	1	0
Fish 2	33	0	1	1
Fish 3	34	2	0	0
Fish 4	27	0	0	1
Fish 5	25	0	0	0
Fish 6	24	2	0	0
Fish 7	19	1	0	2
Fish 8	26	0	1	0
Fish 9	17	2	1	0

## Sheet: Fig 3
Fig 3F-3G	bhlhe23/bhlhe22 sgRNA, sox2 sgRNA TgBAC(sox2:mNeonGreen;bhlhe23:mRuby3), in volume=80×90×10 μm3(H×W×Z)
Cell number	Fish	sox2+ ACs	bhlhe22+ ACs
control sgRNA	Fish 1	42	11
	Fish 2	39	15
	Fish 3	47	20
	Fish 4	29	12
	Fish 5	36	13
	Fish 6	37	14
	Fish 7	41	13
bhlhe22 sgRNA	Fish 1	40	14
	Fish 2	42	8
	Fish 3	31	8
	Fish 4	34	8
	Fish 5	44	11
	Fish 6	45	10
	Fish 7	41	9
	Fish 8	36	14
	Fish 9	42	14
	Fish 10	38	10
	Fish 11	42	11
bhlhe23 sgRNA	Fish 1	31	13
	Fish 2	34	15
	Fish 3	37	12
	Fish 4	31	16
	Fish 5	39	14
	Fish 6	38	12
	Fish 7	41	12
	Fish 8	42	13
	Fish 9	50	16
bhlhe22/bhlhe23 sgRNA	Fish 1	33	3
	Fish 2	34	3
	Fish 3	34	1
	Fish 4	33	0
	Fish 5	26	4
	Fish 6	23	1
	Fish 7	24	1
	Fish 8	45	0
	Fish 9	34	1
sox2 sgRNA	Fish 1	1	15
	Fish 2	3	15
	Fish 3	0	15
	Fish 4	2	11
	Fish 5	2	16
	Fish 6	0	12
	Fish 7	1	12
	Fish 8	1	15
	Fish 9	1	13
	Fish 10	1	12
	Fish 11	0	12

## Sheet: Fig 4
Fig 4C-4E			Fig 4C					Fig 4D
cell number	OFF sox2+ ACs	ON sox2+ ACs	Dendritic diameter:bhlhe22+ off-ACs(unit:μm)	Dendritic diameter:sox2+ off-ACs(unit:μm)	Dendritic diameter:bhlhe22+ on-ACs(unit:μm)	Dendritic diameter:sox2+ on-ACs(unit:μm)		Dendritic area:bhlhe22+ off-ACs(unit:μm2)	Dendritic area:sox2+ off-ACs(unit:μm2)	Dendritic area:bhlhe22+ on-ACs(unit:μm2)	Dendritic area:sox2+ on-ACs(unit:μm2)
retina 1	10	18	95.49	42.828	74.472	35.03		4377.12	622.97	2870.73	429.64
retina 2	11	17	86.296	32.066	76.797	21.16		2850.08	253.36	2310.86	203.72
retina 3	15	25	102.403	25.137	77.336	34.085		5499.72	293.84	2433.69	550.72
retina 4	13	22		35.16	86.093	27.941			449.48	2031.52	385.16
retina 5	15	31		30.878	58.068	25.321			447.577	1331.85	268.24
retina 6	10	27		25.291	82.215	30.384			263.765	2175.18	385.92
retina 7	15	24		37.322	85.05	33.136			426.493	2295.07	404.44
				27.892	68.965	26.052			373.04	1761.09	309.17
Fig 4D-4E				24.557	45.66	27.621			252.44	1017.9	381.15
cell number	OFF bhlhe22+ ACs	ON bhlhe22+ ACs		34.932	58.399	24.109			409.369	963.353	254.543
retina 1	4	6		34.035	57.328	25.807			491.68	1336.7	343.96
retina 2	2	5		29.821	105.753	27.528			398.758	6017.45	365.2
retina 3	2	3		30.181	119.214	25.185			526.4	7483.6	368.72
retina 4	1	5		35.074	116.619				428.56	6811.98
retina 5	1	8		30.047	81.097				505.32	3533.96
retina 6	3	7		28.443	97.745				473.08	5369.12
				34.266	74.3				384.16	2840.24
				31.413	100.13				549.4	5314.68
					98.117					4299.12
					64.351					2249.84
			Fig 4E					Fig 4F
			OFF-laminae:bhlhe22+ ACs(%)	OFF-laminae:sox2+ ACs(%)	ON-laminae:bhlhe22+ ACs(%)	ON-laminae:sox2+ ACs(%)		Cell body in INL:bhlhe22+ ACs(%)	Cell body in INL:sox2+ ACs(%)	Cell body in GCL:bhlhe22+ ACs(%)	Cell body in GCL:sox2+ ACs(%)
			0.4	0.357143	0.6	0.642857		10	10	0	18
			0.285714	0.392857	0.714286	0.607143		7	11	0	17
			0.4	0.375	0.6	0.625		5	15	0	25
			0.166667	0.371429	0.833333	0.628571		6	13	0	22
			0.111111	0.326087	0.888889	0.673913		9	15	0	31
			0.3	0.27027	0.7	0.72973		10	10	0	27	INL: inner nuclear layer
				0.384615		0.615385			15		24	GCL: ganglion cell layer
			Fig 4H
			control sgRNA: sox2+ off-laminae ACs	fezf1 sgRNA: sox2+ off-laminae ACs	control sgRNA: sox2+ on-laminae ACs	fezf1 sgRNA: sox2+ on-laminae ACs	control sgRNA: sox2+ ACs	fezf1 sgRNA: sox2+ ACs	control sgRNA: bhlhe22+ ACs	fezf1 sgRNA: bhlhe22+ ACs
			14	29	28	6	42	35	11	10
			12	27	27	3	39	30	15	14
			14	28	33	9	47	37	20	14
			6	23	23	4	29	27	12	15
			10	27	26	3	36	30	13	8
			10		27		37		14
			13		28		41		13

## Sheet: Fig 5
Fig 5C				Fig 5J				Fig 5K			Fig 5N					Fig 5O
roi number	bhlhe22+ rois	sox2+ rois		Bin Center	bhlhe22+ rois:DSI culmulative frequency	sox2+ rois:DSI culmulative frequency		bhlhe22+ rois:DSI	sox2+ rois:DSI		control sgRNA(unit:Hz)	bhlhe22+ type-ablated(unit:Hz)	control(unit:Hz)	sox2+ type-ablated(unit:Hz)		control sgRNA(unit:degree)	bhlhe22+ type-ablated(unit:degreez)	control(unit:degree)	sox2+ type-ablated(unit:degree)
Responsive-DS	94	335		-0.546	0	0.0974659		-0.0338488	0.820161		0.6375	0.325	0.5	0.5		12.9602	24.592	15.4453	15.235
Responsive-non-DS	1036	691		-0.544	0	0.0974659		0.316258	0.623299		0.625	0.45	0.6875	0.425		22.0025	16.9842	12.6675	24.7022
Non-responsive	78	137		-0.542	0	0.0974659		0.102291	-0.118445		0.625	0.5375	0.675	0.4125		18.5259	7.18503	20.5756	19.2084
				-0.54	0	0.0974659		0.179557	0.742085		0.7	0.4125	0.7375	0.3		18.5518	17.5579	13.9777	13.1428
				-0.538	0	0.0974659		0.519287	0.638663		0.775	0.3375	0.3625	0.35		19.1231	14.0945	12.7852	14.1254
				-0.536	0	0.0974659		0.177916	0.143001		0.7625	0.65	0.7125	0.4125		19.519	12.1868	11.001	14.6932
				-0.534	0	0.0974659		0.0589113	0.7414		0.5125	0.525	0.6625	0.4625		15.7177	13.6326	20.1689	26.608
				-0.532	0	0.0974659		-0.012261	0.756831		0.6	0.025	0.625	0.575		11.1328	18.9546	15.9812	15.7549
				-0.53	0	0.0974659		0.51699	0.245265		0.65	0.2375	0.5	0.525		15.8085	17.5868	15.6705	19.3034
				-0.528	0	0.0974659		0.192491	0.159397		0.775	0.5	0.3125	0.3375		14.7867	12.8964	11.1303	19.5393
				-0.526	0	0.0974659		0.314242	0.519177		0.55	0.35	0.5625	0.45		15.2628	10.581	22.2701	22.5848
				-0.524	0	0.0974659		0.237204	0.719185		0.65	0.1625	0.475	0.6125		18.3554	21.2766	25.9966	17.8239
				-0.522	0	0.0974659		0.270534	0.558585		0.725	0.525	0.5	0.2125		16.9871	17.4044	25.8582	14.2756
				-0.52	0	0.0974659		0.342486	0.178229		0.4625	0.6625	0.575	0.6625		7.91435	13.6787	13.8489	11.0165
				-0.518	0	0.0974659		0.0961109	0.0991683		0.7375	0.05	0.5375	0.3875		19.5348	9.13644	18.2168	10.3948
				-0.516	0	0.0974659		0.269689	0.531206		0.7125	0.2125	0.7125	0.7375		16.0201	16.9114	13.712	21.4598
				-0.514	0	0.0974659		0.160363	0.467063		0.5125	0.3375	0.4125	0.6375		23.5647	15.3712	22.2649	17.0002
				-0.512	0	0.0974659		0.204863	0.30152		0.5625	0.5375	0.5875	0.6		19.0749	9.2345	15.7204	12.7928
				-0.51	0	0.0974659		0.31437	0.552661		0.425	0.6125	0.6875	0.3875		10.7353	8.48952	12.2706	18.5643
				-0.508	0	0.0974659		0.271914	0.476601			0.7625	0.725	0.4625			12.1382	13.7012	21.5759
				-0.506	0	0.0974659		0.22464	0.329652			0.25	0.6375	0.2375			21.0292	18.1069	7.08244
				-0.504	0	0.0974659		0.418885	0.517403				0.65	0.4				17.4302	12.9622
				-0.502	0	0.0974659		0.376437	0.621935				0.3375	0.275				6.82305	12.0678
				-0.5	0	0.0974659		0.670807	0.383199				0.625	0.575				11.8852	10.7367
				-0.498	0	0.0974659		0.606117	0.636698					0.3375					10.6835
				-0.496	0	0.0974659		0.473565	0.791919
				-0.494	0	0.0974659		0.395505	0.666992
				-0.492	0	0.0974659		0.328974	0.48595
				-0.49	0	0.0974659		0.329129	0.29159
				-0.488	0	0.0974659		0.109891	0.462743
				-0.486	0	0.0974659		0.222937	0.114911
				-0.484	0	0.0974659		-0.060809	0.362957
				-0.482	0	0.0974659		0.0633456	0.685059
				-0.48	0	0.0974659		0.074996	0.502685
				-0.478	0	0.0974659		0.111765	0.466314
				-0.476	0	0.0974659		0.315299	0.624383
				-0.474	0	0.0974659		0.0510461	0.606208
				-0.472	0	0.0974659		0.219318	0.777396
				-0.47	0	0.0974659		0.129065	0.841103
				-0.468	0	0.0974659		0.112524	0.672339
				-0.466	0	0.0974659		0.19218	0.857852
				-0.464	0	0.0974659		0.195619	0.712553
				-0.462	0	0.0974659		0.156593	0.821008
				-0.46	0	0.0974659		0.095233	0.655522
				-0.458	0	0.0974659		0.203567	0.682479
				-0.456	0	0.0974659		0.210315	0.159599
				-0.454	0	0.0974659		0.149538	0.159599
				-0.452	0	0.0974659		0.148511	-0.269131
				-0.45	0	0.0974659		0.250317	0.104624
				-0.448	0	0.0974659		0.0936299	0.853883
				-0.446	0	0.0974659		0.152903	-0.211039
				-0.444	0	0.0974659		0.100159	0.919188
				-0.442	0	0.0974659		0.204988	0.993548
				-0.44	0	0.0974659		0.132378	0.255739
				-0.438	0	0.0974659		0.141346	1
				-0.436	0	0.0974659		0.267339	0.789719
				-0.434	0	0.0974659		0.0856808	0.442249
				-0.432	0	0.0974659		0.146656	0.667513
				-0.43	0	0.0974659		0.203565	0.768682
				-0.428	0	0.0974659		0.160296	0.183352
				-0.426	0	0.194932		0.203102	0.647898
				-0.424	0	0.194932		0.0794536	0.793463
				-0.422	0	0.194932		0.227487	0.503967
				-0.42	0	0.194932		0.123302	0.732942
				-0.418	0	0.194932		0.0881914	0.852574
				-0.416	0	0.194932		0.0773028	1
				-0.414	0	0.194932		0.109386	0.455805
				-0.412	0	0.194932		0.352422	0.285175
				-0.41	0	0.194932		0.0821921	0.759488
				-0.408	0	0.194932		0.265914	0.768287
				-0.406	0	0.194932		0.166328	0.896477
				-0.404	0	0.194932		0.0913663	0.942402
				-0.402	0	0.194932		0.176023	0.287817
				-0.4	0	0.194932		0.164661	0.469656
				-0.398	0	0.194932		0.10138	0.805971
				-0.396	0	0.194932		0.277261	0.659124
				-0.394	0	0.292398		-0.0148779	0.435273
				-0.392	0	0.292398		0.220763	0.186409
				-0.39	0	0.292398		0.494302	0.24683
				-0.388	0	0.292398		0.266119	0.951821
				-0.386	0	0.292398		0.186672	1
				-0.384	0	0.292398		0.0991124	0.629815
				-0.382	0	0.292398		0.440106	0.566522
				-0.38	0	0.292398		0.111144	0.966385
				-0.378	0	0.292398		0.246593	1
				-0.376	0	0.292398		0.197225	0.387841
				-0.374	0	0.292398		0.239309	1
				-0.372	0	0.292398		0.279878	0.549418
				-0.37	0	0.292398		0.115777	0.574626
				-0.368	0	0.292398		0.197578	0.489628
				-0.366	0	0.292398		0.278407	0.89911
				-0.364	0	0.292398		0.124305	0.593701
				-0.362	0	0.292398		0.390998	0.572415
				-0.36	0	0.292398		0.209555	0.248979
				-0.358	0	0.292398		0.215377	0.468731
				-0.356	0	0.292398		0.44966	1
				-0.354	0	0.292398		-0.0580283	0.855656
				-0.352	0	0.292398		0.221724	1
				-0.35	0	0.292398		0.42864	1
				-0.348	0	0.292398		0.14428	1
				-0.346	0	0.292398		0.218047	1
				-0.344	0	0.292398		0.269205	1
				-0.342	0	0.292398		0.0331949	0.173386
				-0.34	0	0.292398		0.150465	-0.0465432
				-0.338	0	0.292398		0.178257	0.185588
				-0.336	0	0.292398		0.297422	0.281908
				-0.334	0	0.292398		0.0791198	0.151379
				-0.332	0	0.292398		0.146017	0.0949111
				-0.33	0	0.292398		0.203658	0.0830353
				-0.328	0	0.292398		0.395063	0.432372
				-0.326	0	0.292398		0.207484	0.0696497
				-0.324	0	0.292398		-0.000940187	0.356839
				-0.322	0	0.292398		0.65915	0.550027
				-0.32	0	0.292398		0.135333	0.142723
				-0.318	0	0.292398		0.268046	0.186733
				-0.316	0	0.292398		0.391511	0.0929818
				-0.314	0	0.292398		0.911066	-0.020872
				-0.312	0	0.292398		0.199327	0.242318
				-0.31	0	0.292398		-0.0700243	0.312514
				-0.308	0	0.292398		0.503451	-0.105972
				-0.306	0	0.292398		0.140873	0.457871
				-0.304	0	0.292398		0.0905329	0.340367
				-0.302	0	0.292398		0.0338446	0.0419239
				-0.3	0	0.292398		0.0141955	0.12243
				-0.298	0	0.389864		0.0954921	0.219401
				-0.296	0	0.389864		0.265207	-0.15805
				-0.294	0	0.389864		0.228935	-0.195099
				-0.292	0	0.389864		0.312381	0.456517
				-0.29	0	0.487329		0.231217	0.216719
				-0.288	0	0.487329		0.671486	0.10588
				-0.286	0	0.487329		1	0.118646
				-0.284	0	0.487329		-0.0390468	0.221654
				-0.282	0.0884956	0.487329		0.253639	0.323775
				-0.28	0.0884956	0.487329		0.269389	0.225215
				-0.278	0.0884956	0.487329		0.0907552	-0.0219664
				-0.276	0.0884956	0.487329		0.214317	0.0307891
				-0.274	0.0884956	0.487329		0.243103	0.334091
				-0.272	0.0884956	0.487329		0.18354	-0.153168
				-0.27	0.0884956	0.584795		-0.110076	0.294047
				-0.268	0.0884956	0.584795		0.160757	0.0773399
				-0.266	0.0884956	0.584795		0.218531	0.391084
				-0.264	0.0884956	0.584795		0.14982	0.402474
				-0.262	0.0884956	0.584795		0.188856	0.225207
				-0.26	0.0884956	0.584795		0.0091233	0.275312
				-0.258	0.0884956	0.584795		0.32897	0.30736
				-0.256	0.0884956	0.584795		0.149592	0.280779
				-0.254	0.0884956	0.584795		0.300691	0.180062
				-0.252	0.0884956	0.584795		0.451297	0.197132
				-0.25	0.0884956	0.584795		0.396424	0.231157
				-0.248	0.0884956	0.584795		0.214027	0.26125
				-0.246	0.0884956	0.584795		0.308886	0.20124
				-0.244	0.0884956	0.584795		0.361142	0.18754
				-0.242	0.0884956	0.584795		0.287469	0.105325
				-0.24	0.0884956	0.584795		0.150163	0.0534599
				-0.238	0.0884956	0.584795		0.265532	0.239966
				-0.236	0.0884956	0.584795		0.120999	0.00556261
				-0.234	0.0884956	0.584795		0.360188	0.201197
				-0.232	0.0884956	0.584795		-0.281499	0.245316
				-0.23	0.176991	0.584795		0.182298	0.291839
				-0.228	0.176991	0.584795		0.1589	0.115952
				-0.226	0.176991	0.584795		0.317537	0.347859
				-0.224	0.176991	0.584795		0.191793	0.915613
				-0.222	0.176991	0.584795		0.275643	0.879246
				-0.22	0.176991	0.584795		0.306342	0.882176
				-0.218	0.176991	0.682261		0.0360459	0.39484
				-0.216	0.176991	0.682261		0.235176	0.902728
				-0.214	0.176991	0.682261		0.211932	0.97149
				-0.212	0.176991	0.779727		0.222641	0.938762
				-0.21	0.265487	0.779727		0.0220641	0.887021
				-0.208	0.265487	0.779727		0.167708	0.942262
				-0.206	0.265487	0.779727		0.127973	0.945057
				-0.204	0.265487	0.779727		0.23357	0.917286
				-0.202	0.353982	0.779727		0.0488201	-0.133299
				-0.2	0.353982	0.779727		0.0044582	0.0131972
				-0.198	0.353982	0.779727		0.0826285	0.62102
				-0.196	0.353982	0.877193		0.144709	0.423339
				-0.194	0.353982	0.974659		0.142624	0.552897
				-0.192	0.353982	0.974659		0.271352	0.714341
				-0.19	0.353982	0.974659		0.100465	0.852841
				-0.188	0.353982	0.974659		0.0572043	0.375464
				-0.186	0.353982	0.974659		0.165036	0.661837
				-0.184	0.353982	0.974659		0.268017	0.373097
				-0.182	0.353982	0.974659		0.358513	0.623156
				-0.18	0.353982	0.974659		0.0685956	0.572239
				-0.178	0.442478	1.07212		0.186859	0.761159
				-0.176	0.442478	1.07212		0.0813764	0.83467
				-0.174	0.442478	1.07212		0.56054	0.474589
				-0.172	0.442478	1.07212		0.396352	0.397125
				-0.17	0.442478	1.07212		0.370759	0.603773
				-0.168	0.442478	1.07212		0.159693	0.712414
				-0.166	0.530973	1.07212		-0.0771933	0.600849
				-0.164	0.619469	1.07212		0.22224	0.563482
				-0.162	0.619469	1.07212		0.530942	0.622769
				-0.16	0.619469	1.07212		0.383627	0.600444
				-0.158	0.619469	1.16959		0.383891	0.789755
				-0.156	0.619469	1.36452		0	0.62029
				-0.154	0.619469	1.46199		-0.0808493	0.624738
				-0.152	0.707965	1.46199		0.324898	0.0745645
				-0.15	0.707965	1.46199		0.332248	0.0638914
				-0.148	0.707965	1.46199		0.275354	0.755543
				-0.146	0.79646	1.46199		0.230568	0.673113
				-0.144	0.79646	1.46199		-0.230262	0.773471
				-0.142	0.884956	1.46199		0.163663	0.763874
				-0.14	0.884956	1.46199		0.486827	0.670578
				-0.138	0.884956	1.46199		0.219263	0.166693
				-0.136	0.884956	1.55945		0.323766	0.690763
				-0.134	0.884956	1.65692		0.0419816	0
				-0.132	0.884956	1.65692		0.266154	0.244142
				-0.13	0.884956	1.65692		0.178365	0.300718
				-0.128	0.884956	1.65692		0.222084	0.674936
				-0.126	0.884956	1.65692		0.16936	0.380388
				-0.124	0.884956	1.65692		0.217719	0.328829
				-0.122	0.884956	1.65692		0.415588	0.0734668
				-0.12	0.884956	1.65692		0.313059	0.45277
				-0.118	0.884956	1.75439		0.479158	0.306191
				-0.116	0.884956	1.75439		0.0510974	0.27794
				-0.114	0.973451	1.75439		0.481802	0.305094
				-0.112	0.973451	1.75439		0.00902587	0.262419
				-0.11	1.15044	1.75439		0.0287758	0.241354
				-0.108	1.15044	1.75439		0.135495	0.316653
				-0.106	1.23894	1.85185		0.147872	0.345941
				-0.104	1.23894	1.85185		0.181932	0.889865
				-0.102	1.23894	1.94932		0.136	0.782245
				-0.1	1.32743	1.94932		0.502333	0.392575
				-0.098	1.50442	1.94932		0.0881833	0.375267
				-0.096	1.50442	1.94932		1	1
				-0.094	1.50442	1.94932		0.750695	0.328002
				-0.092	1.50442	1.94932		-0.035615	1
				-0.09	1.50442	1.94932		0.42109	0.933318
				-0.088	1.50442	2.04678		0.248821	0.927212
				-0.086	1.50442	2.24172		-0.202544	0.870272
				-0.084	1.59292	2.24172		0.070067	0.184103
				-0.082	1.68142	2.24172		0.150074	1
				-0.08	1.76991	2.33918		0.281205	0.824848
				-0.078	1.9469	2.43665		0.537353	0.837092
				-0.076	1.9469	2.53411		0.30122	0.933961
				-0.074	2.0354	2.63158		0.388609	1
				-0.072	2.0354	2.63158		0.252415	0.930492
				-0.07	2.12389	3.02144		0.164933	1
				-0.068	2.12389	3.02144		0.163135	1
				-0.066	2.21239	3.02144		0.101842	1
				-0.064	2.38938	3.11891		0.329812	1
				-0.062	2.92035	3.21637		0.0110269	1
				-0.06	3.09735	3.21637		0.27257	-0.0706349
				-0.058	3.18584	3.21637		0.326821	1
				-0.056	3.18584	3.31384		0.0333882	0.53504
				-0.054	3.27434	3.31384		0.110141	0.566847
				-0.052	3.45133	3.31384		0.41757	0.50608
				-0.05	3.45133	3.31384		0.0317523	0.425159
				-0.048	3.45133	3.41131		0.334288	0.237785
				-0.046	3.45133	3.60624		0.136261	0.210682
				-0.044	3.71681	3.7037		0.116429	0.201237
				-0.042	3.80531	3.7037		0.16986	0.893062
				-0.04	4.0708	3.80117		0.0849163	0.593741
				-0.038	4.0708	3.89864		0.161991	0.580511
				-0.036	4.42478	3.89864		0.250804	0.592854
				-0.034	4.60177	4.19103		0.336677	0.442384
				-0.032	4.77876	4.2885		0.107587	0.494594
				-0.03	5.30973	4.2885		0.123304	0.701571
				-0.028	5.30973	4.2885		0.301629	0.26623
				-0.026	5.30973	4.38596		0.265999	0.223888
				-0.024	5.39823	4.48343		0.282244	1
				-0.022	5.39823	4.67836		0.512008	1
				-0.02	5.39823	4.87329		0.0958	0.838252
				-0.018	5.48673	4.97076		0.339978	0.582171
				-0.016	5.66372	5.06823		0.358918	0.515031
				-0.014	5.9292	5.06823		0.0754187	0.528815
				-0.012	6.19469	5.16569		0.281405	0.462204
				-0.01	6.37168	5.16569		0.206558	0.564961
				-0.008	6.63717	5.16569		0.0895971	0.353239
				-0.006	6.81416	5.26316		0.0825463	0.220447
				-0.004	6.90265	5.36062		0.391069	0.149865
				-0.002	7.07965	5.45809		-0.0335468	1
				0	8.67257	7.21248		-0.0367257	0
				0.002	8.67257	7.21248		-0.0306671	0.45197
				0.004	9.20354	7.21248		0.123874	0.552833
				0.006	9.29204	7.50487		0.0221359	0.485537
				0.008	9.29204	7.50487		0.0864995	0.544866
				0.01	9.55752	7.50487		0.440103	0.468866
				0.012	9.82301	7.69981		0.0355704	0.573853
				0.014	9.9115	7.89474		0.313646	0.345326
				0.016	9.9115	7.9922		0.703302	0.905132
				0.018	10	7.9922		0.347055	0.522479
				0.02	10.0885	7.9922		0.0915713	0.315545
				0.022	10.4425	7.9922		0.0648214	0.520378
				0.024	10.6195	7.9922		0.55587	0.0482218
				0.026	10.708	7.9922		0.391867	0.380266
				0.028	11.1504	8.08967		0.162377	0.596425
				0.03	11.2389	8.2846		0.0916333	0.343462
				0.032	11.3274	8.38207		0.149395	0.741257
				0.034	11.8584	8.577		0.361738	0.294918
				0.036	12.1239	8.8694		0.450673	0.396926
				0.038	12.3009	8.96686		0.49068	0.299127
				0.04	12.5664	9.16179		-0.0610852	0.0497972
				0.042	12.8319	9.25926		-0.151737	0.563506
				0.044	12.9204	9.45419		0.624474	0.115636
				0.046	13.0973	9.55166		0.225002	0
				0.048	13.3628	9.64912		0.0339927	0.760162
				0.05	13.8053	9.84405		0.398494	0.247594
				0.052	14.2478	10.039		0.4821	0.519011
				0.054	14.3363	10.2339		0.085349	0.228428
				0.056	14.6903	10.7212		0.437809	0.293684
				0.058	15.0442	10.8187		0.165506	0.308759
				0.06	15.1327	10.8187		0.180913	0.388337
				0.062	15.3097	11.0136		0.46591	0.152733
				0.064	15.7522	11.306		0.0593861	0.822399
				0.066	16.1062	11.306		0.244953	0.0328245
				0.068	16.3717	11.5984		0.195254	0.489302
				0.07	16.6372	11.8908		-0.0626489	0.659294
				0.072	16.9912	12.0858		0.0481345	0.494396
				0.074	17.5221	12.3782		-0.0405131	0.552794
				0.076	18.0531	12.4756		0.0907502	0.21895
				0.078	18.3186	12.8655		0.049008	0.85661
				0.08	18.8496	12.963		0.143607	0.279866
				0.082	19.469	13.0604		0.107084	0.724694
				0.084	19.7345	13.3528		0.251781	0.0558068
				0.086	20.177	13.5478		0.356801	0.808951
				0.088	20.885	13.6452		0.20823	0.57442
				0.09	21.4159	13.7427		0.0217349	0.385601
				0.092	22.1239	13.9376		-0.0622999	0.379544
				0.094	22.3894	14.23		0.241188	0.186163
				0.096	22.8319	14.3275		0	0.492082
				0.098	22.9204	14.5224		0	0.85067
				0.1	23.2743	14.7173		0	0.756859
				0.102	23.7168	15.0097		0	0.868852
				0.104	24.1593	15.3021		0	0.665485
				0.106	24.4248	15.7895		0	0.627619
				0.108	24.8673	15.8869		0	-0.194583
				0.11	25.5752	16.0819		0	0.32475
				0.112	26.0177	16.0819		0	0.408945
				0.114	26.1947	16.2768		0	-0.0784107
				0.116	26.4602	16.7641		0	-0.297778
				0.118	26.8142	17.0565		0.346091	-0.290151
				0.12	27.3451	17.5439		-0.0782769	0.517503
				0.122	27.6991	17.7388		0.383077	0
				0.124	28.6726	17.8363		0.235405	0.412281
				0.126	29.0265	18.0312		0.0575148	0
				0.128	29.292	18.0312		0.342596	0.675034
				0.13	29.469	18.1287		0.266494	0
				0.132	29.7345	18.2261		0.186387	0.256333
				0.134	30.0885	18.4211		0.223466	0.866237
				0.136	30.708	18.7135		0.239316	0.708709
				0.138	30.9735	18.7135		0.234501	0.443004
				0.14	31.3274	19.0058		0.089634	0.531322
				0.142	31.9469	19.5906		-0.0441154	0
				0.144	32.4779	19.6881		-0.064154	0
				0.146	33.0088	19.883		0.309504	0.12034
				0.148	33.6283	20.1754		-0.039726	0.362968
				0.15	34.4248	20.2729		-0.0615905	0.291867
				0.152	34.6903	20.6628		0.155871	-0.0124857
				0.154	34.8673	21.0526		0.0716278	0.949974
				0.156	35.3982	21.345		0.178099	0.906897
				0.158	35.9292	21.54		0.215662	0.105166
				0.16	36.5487	22.2222		0.411529	0.35081
				0.162	37.0796	22.4172		0.445688	0.590867
				0.164	37.9646	22.6121		0.268478	0.754322
				0.166	38.7611	23.0019		0.358718	0.674251
				0.168	39.0265	23.0994		0.411185	0.0575204
				0.17	39.3805	23.4893		0.46956	0.12177
				0.172	39.823	23.6842		0.322229	0.0390516
				0.174	40.2655	24.4639		0.422479	-0.00505765
				0.176	40.531	24.5614		0.346164	0.284757
				0.178	41.0619	24.7563		0.339663	0.258306
				0.18	41.4159	25.5361		0.27498	0.169185
				0.182	41.8584	25.9259		0.25834	0.305484
				0.184	42.3009	26.3158		0.192714	0.32209
				0.186	42.9204	27.0955		0.165208	0.273499
				0.188	43.2743	27.193		0.395795	0.169771
				0.19	43.8053	27.3879		0.320697	0.304382
				0.192	44.6018	27.5828		0.242153	-0.0858216
				0.194	44.7788	27.5828		0.36957	0.179853
				0.196	45.2212	27.8752		0.212258	0.327592
				0.198	46.1062	28.2651		0.10428	0.0336747
				0.2	46.2832	28.46		0.109458	0.546742
				0.202	46.6372	28.9474		-0.0110262	0.182283
				0.204	47.8761	29.1423		-0.0351681	0.765004
				0.206	48.2301	29.3372		0.166401	0.801742
				0.208	48.5841	29.7271		0.169536	-0.0807733
				0.21	49.0265	30.3119		0.119496	0.902893
				0.212	49.3805	30.4094		0.305162	0.946236
				0.214	50.177	30.7018		0.118722	0
				0.216	50.708	31.0916		0.172411	1
				0.218	51.3274	31.384		0.159803	1
				0.22	51.8584	32.0663		0.143452	0.348004
				0.222	52.4779	32.5536		0.126613	1
				0.224	53.0088	32.7485		-0.0315033	1
				0.226	53.3628	33.4308		-0.0657881	0.285151
				0.228	53.6283	33.7232		0.173425	0
				0.23	54.2478	33.9181		0.360219	0
				0.232	54.9558	34.2105		0.175712	1
				0.234	55.3097	34.6004		0.0956848	0.860231
				0.236	55.5752	35.0877		0.12114	0.711621
				0.238	55.8407	35.2827		0.164374	0
				0.24	56.1062	35.77		0.428516	0.309576
				0.242	56.4602	36.0624		0.394057	0.72068
				0.244	57.2566	36.5497		0.179284	0.279543
				0.246	57.6991	37.4269		0.353069	0.289689
				0.248	58.0531	37.6218		0.28679	0.241717
				0.25	58.4956	37.9142		0.154147	0.125209
				0.252	59.0265	38.3041		0.317379	0.24678
				0.254	59.7345	38.5965		0.157032	0.226866
				0.256	60	39.3762		0.203781	0.235619
				0.258	60.177	39.7661		0.320931	0.255084
				0.26	60.4425	40.1559		0.121009	0.195529
				0.262	60.9735	40.4483		0.0912541	0.204451
				0.264	61.2389	40.6433		0.0878525	0.587796
				0.266	61.8584	41.0331		0.109386	0.169429
				0.268	62.3894	41.1306		0.0512584	0.344736
				0.27	62.9204	41.2281		0.216998	0.182821
				0.272	63.2743	41.5205		0.24765	0.351608
				0.274	63.8053	41.9103		0.259052	0.18663
				0.276	63.9823	42.1053		0.101165	0.219424
				0.278	64.5133	42.5926		0.142409	0.589782
				0.28	65.0442	42.885		0.142804	0.101086
				0.282	65.7522	43.1774		0.231492	0.57888
				0.284	66.1947	43.5673		0.0767489	1
				0.286	66.7257	43.8596		0.12569	0.726428
				0.288	67.0796	43.9571		0.251865	0.741071
				0.29	67.3451	44.152		0.262687	1
				0.292	67.4336	44.6394		0.192977	0.970972
				0.294	67.4336	45.1267		0.24709	0.333644
				0.296	67.7876	45.1267		0.313943	0.246873
				0.298	68.4071	45.3216		0.208356	0.344256
				0.3	68.9381	45.614		0.40279	0.263347
				0.302	69.3805	45.9064		0.226542	1
				0.304	69.469	46.4912		0.441429	0.47787
				0.306	69.7345	46.8811		0.109782	0.562854
				0.308	70.0885	47.1735		0.0618971	0.347327
				0.31	70.2655	47.6608		-0.114579	0.163657
				0.312	70.4425	48.0507		0.07638	0.19591
				0.314	71.1504	48.2456		0.448143	1
				0.316	71.5929	48.9279		0.133856	0.538141
				0.318	71.9469	49.0253		0.314351	0.221723
				0.32	72.3894	49.3177		0.0287984	1
				0.322	72.6549	49.6101		-0.145954	1
				0.324	73.0973	49.9025		0.503126	0.315758
				0.326	73.6283	49.9025		-0.0540834	-0.0258493
				0.328	74.0708	50.3899		0.102925	0.0732349
				0.33	74.4248	50.4873		0.519105	0.0694929
				0.332	74.7788	50.6823		0.588341	0.148814
				0.334	74.8673	51.0721		0.288881	0.348518
				0.336	75.4867	51.1696		0.538595	0.235634
				0.338	75.6637	51.2671		0.19739	0.335269
				0.34	76.1947	51.6569		0.411805	0.54808
				0.342	76.7257	51.8519		0.141304	0.451455
				0.344	77.0796	52.2417		-0.00360027	0.434908
				0.346	77.4336	52.729		0.107727	0.512918
				0.348	77.6991	53.2164		0.112133	0.46293
				0.35	77.9646	53.4113		0.282698	0.437833
				0.352	78.2301	53.6062		0.344617	0.440243
				0.354	78.6726	53.8012		0.340821	0.145979
				0.356	78.8496	54.0936		0.446156	0.409992
				0.358	79.2035	54.386		0.310067	0.63761
				0.36	79.646	54.386		0.213252	0.234108
				0.362	80	54.8733		0.354036	0.284549
				0.364	80.177	55.2632		0.125773	0.246884
				0.366	80.2655	55.4581		0	0.177791
				0.368	80.4425	55.5556		0.0301817	0.3856
				0.37	80.7965	55.848		0.14379	0.310882
				0.372	80.9735	56.2378		0.201896	0.291973
				0.374	81.0619	56.5302		0.467142	0.0766519
				0.376	81.1504	56.8226		0.491607	0.160376
				0.378	81.4159	56.9201		0.117994	0.225305
				0.38	81.4159	57.4074		0.667151	0.773247
				0.382	81.6814	57.5049		0.0889626	0.0780691
				0.384	82.1239	57.6998		0.261212	0.257421
				0.386	82.3009	57.8947		0.33545	0.157733
				0.388	82.4779	58.0897		0.499567	0.320123
				0.39	82.6549	58.2846		0.53671	0.25541
				0.392	83.0088	58.577		0.202668	0.051944
				0.394	83.2743	58.8694		0.192838	0.131279
				0.396	83.8053	58.9669		0.165986	0.221295
				0.398	84.0708	59.1618		0.216279	0.0110969
				0.4	84.1593	59.2593		0.571309	0.155014
				0.402	84.2478	59.4542		0.267467	0.345827
				0.404	84.4248	59.6491		0.224364	0.300804
				0.406	84.5133	59.7466		0.326579	0.0939043
				0.408	84.6018	59.8441		0.229991	0.0565806
				0.41	84.6903	60.039		0.667514	0.58668
				0.412	85.1327	60.2339		0.27723	0.0562474
				0.414	85.3982	60.4288		0.273138	0.267813
				0.416	85.4867	60.5263		0.124342	0.106361
				0.418	85.7522	60.6238		0.120293	0.324428
				0.42	85.7522	60.7212		0.514069	0.369985
				0.422	86.0177	60.8187		-0.178245	0.35827
				0.424	86.1062	61.0136		0.165208	0.214735
				0.426	86.2832	61.2086		0.162216	0.0894865
				0.428	86.6372	61.2086		0.0789799	0.140494
				0.43	86.6372	61.2086		0.386289	0.331265
				0.432	86.6372	61.306		0.296886	0.101924
				0.434	86.6372	61.4035		0.6223	0.154711
				0.436	86.6372	61.7934		0.217908	0.46437
				0.438	86.9027	61.9883		0.164845	0.0623029
				0.44	87.1681	62.1832		0.698613	0.168008
				0.442	87.3451	62.4756		0.525969	0.260732
				0.444	87.4336	62.6706		0.301182	0.36539
				0.446	87.6991	62.6706		0.287861	0.180196
				0.448	87.8761	62.6706		0.261888	0.192945
				0.45	88.0531	62.8655		0.425979	0.218394
				0.452	88.3186	63.2554		0.189511	0.0839921
				0.454	88.4071	63.2554		0.452854	0.252025
				0.456	88.4071	63.5478		0.256695	0.153859
				0.458	88.8496	63.8402		0.23871	0.309009
				0.46	88.9381	64.0351		0.24241	0.146323
				0.462	89.0265	64.3275		0.286174	0.103609
				0.464	89.115	64.6199		0.233626	0.0347581
				0.466	89.2035	64.9123		0.367082	0.444784
				0.468	89.5575	65.2047		0.317127	0.239826
				0.47	89.823	65.3021		0.263108	0.380726
				0.472	89.823	65.3996		0.340584	0.560781
				0.474	90	65.5945		-0.0511284	0.476123
				0.476	90.0885	65.7895		0.184783	0.442647
				0.478	90.177	65.8869		0.0924933	0.401465
				0.48	90.4425	66.0819		-0.0449476	0.304373
				0.482	90.708	66.2768		0.0264915	0.166745
				0.484	90.885	66.2768		0.0331137	0.302178
				0.486	90.9735	66.6667		0.0560861	0.0973638
				0.488	90.9735	66.6667		0.342508	0.175637
				0.49	91.1504	66.9591		-0.110729	0.27115
				0.492	91.3274	67.0565		-0.0318418	0.303262
				0.494	91.4159	67.2515		0.249019	0.277998
				0.496	91.5929	67.3489		0.336209	-0.0558799
				0.498	91.5929	67.3489		0.385852	-0.102321
				0.5	91.6814	67.3489		0.397086	0.270573
				0.502	91.9469	67.4464		0.00695716	0.315604
				0.504	92.2124	67.6413		0.156118	0.219204
				0.506	92.3009	67.7388		0.270953	0.404757
				0.508	92.4779	67.7388		0.280507	0.16684
				0.51	92.4779	67.8363		0.214424	0.215554
				0.512	92.5664	68.1287		0.371319	0.109807
				0.514	92.6549	68.1287		0.320489	0.278509
				0.516	92.9204	68.2261		0.327811	0.602268
				0.518	93.0088	68.4211		0.100943	0.25268
				0.52	93.2743	68.8109		0.388237	0.638512
				0.522	93.3628	68.9084		0.285774	0.319611
				0.524	93.4513	69.1033		0.30525	0.403846
				0.526	93.5398	69.2982		0.342294	0.355073
				0.528	93.5398	69.4932		0.251365	0.449801
				0.53	93.6283	69.7856		0.109754	0.135058
				0.532	93.6283	70.078		-0.0510832	0.0670301
				0.534	93.7168	70.1754		0.235995	0.0559464
				0.536	93.8938	70.3704		0.496819	0.356725
				0.538	94.0708	70.4678		0.343992	0.277434
				0.54	94.0708	70.4678		0.620322	0
				0.542	94.0708	70.4678		-0.209891	0.130515
				0.544	94.0708	70.6628		0.339964	0.192804
				0.546	94.0708	70.9552		0.147904	0.398105
				0.548	94.0708	71.2476		0.136151	0.251296
				0.55	94.0708	71.4425		0.0529706	0.286813
				0.552	94.1593	71.9298		0.285604	0.0855461
				0.554	94.1593	71.9298		0.16923	0.161255
				0.556	94.2478	72.0273		0.115896	0.249628
				0.558	94.2478	72.1248		0.0879747	0.316536
				0.56	94.3363	72.4172		0.0732848	0
				0.562	94.3363	72.5146		0.21633	0.370722
				0.564	94.3363	72.9045		0.196872	0.578349
				0.566	94.4248	73.2943		0.34634	0.235666
				0.568	94.5133	73.4893		0.249607	0.372607
				0.57	94.5133	73.4893		0.479014	0.27581
				0.572	94.6018	73.6842		0.484413	-0.0696184
				0.574	94.6903	73.9766		0.124979	0.225553
				0.576	94.7788	74.0741		0.200622	0.257741
				0.578	94.8673	74.269		0.091077	0.328802
				0.58	94.9558	74.4639		0.181016	0.390295
				0.582	94.9558	74.5614		0.211417	0.376958
				0.584	94.9558	74.5614		0.163634	0.135235
				0.586	94.9558	74.6589		0.395705	0.0163642
				0.588	95.0442	74.8538		0.252659	0.620992
				0.59	95.1327	75.0487		-0.0118261	0.769884
				0.592	95.1327	75.3411		0.0507501	0.311499
				0.594	95.1327	75.5361		0.32175	0.357332
				0.596	95.1327	75.731		0.229691	0.0513271
				0.598	95.1327	75.8285		-0.0309938	-0.0641983
				0.6	95.3097	76.0234		0.0740587	0.243483
				0.602	95.4867	76.1209		0.277445	0.307799
				0.604	95.5752	76.2183		0.316899	0.523554
				0.606	95.6637	76.3158		0.123272	0.393503
				0.608	95.6637	76.3158		0.250931	-0.0696005
				0.61	95.7522	76.3158		0.187432	0.27303
				0.612	95.7522	76.4133		0.393379	0.464803
				0.614	95.7522	76.6082		0.746284	-0.0348551
				0.616	95.7522	76.6082		0.327055	0.181258
				0.618	95.8407	76.7057		0.349872	0.389197
				0.62	95.9292	76.9006		0.602647	0.0973943
				0.622	96.1062	77.193		0.120934	0.186276
				0.624	96.1947	77.5828		0.300169	0.435235
				0.626	96.1947	77.5828		0.336287	0.313763
				0.628	96.1947	77.6803		0.25978	0.342792
				0.63	96.1947	77.8752		0.221439	0.250781
				0.632	96.1947	77.9727		0.440357	0.0639354
				0.634	96.1947	77.9727		0.0677711	0.0506304
				0.636	96.1947	78.0702		0.44325	0.41117
				0.638	96.1947	78.5575		0.257385	0.29855
				0.64	96.1947	78.9474		0.143954	0.210973
				0.642	96.1947	79.0448		0.326927	0.221975
				0.644	96.1947	79.2398		0.341151	0.3623
				0.646	96.1947	79.3372		0.113123	0.482529
				0.648	96.2832	79.4347		0.37229	0.0304931
				0.65	96.2832	79.5322		0.189943	0.399245
				0.652	96.2832	79.5322		0.361545	0.220119
				0.654	96.2832	79.5322		0.469622	0.934028
				0.656	96.2832	79.6296		-0.0971206	0.214852
				0.658	96.3717	79.8246		0.15606	0.425487
				0.66	96.4602	80.0195		0.0765083	0.0721613
				0.662	96.4602	80.2144		0.065033	-0.0346189
				0.664	96.5487	80.4094		0.349909	0.309049
				0.666	96.6372	80.6043		0.232621	0.30144
				0.668	96.8142	80.7992		0.0933908	0.0702756
				0.67	96.9912	80.8967		0.0741879	0.208236
				0.672	97.0796	80.9942		0.323576	0.228832
				0.674	97.0796	81.2865		0.187029	0.304726
				0.676	97.1681	81.384		0.248504	0.366363
				0.678	97.1681	81.384		0.0925893	0.704593
				0.68	97.1681	81.384		0.231203	0.116844
				0.682	97.2566	81.5789		0.4148	0.230221
				0.684	97.2566	81.5789		0.111303	0.201395
				0.686	97.2566	81.6764		-0.000797757	0.180057
				0.688	97.2566	81.6764		0.335704	0.260617
				0.69	97.2566	82.0663		0.0662954	-0.0185685
				0.692	97.2566	82.0663		0.335565	0.0793915
				0.694	97.3451	82.1637		0.347657	0.107879
				0.696	97.3451	82.2612		0.142247	0.341303
				0.698	97.4336	82.2612		0.0865867	0.212783
				0.7	97.5221	82.2612		0.13315	0.0952863
				0.702	97.5221	82.3587		0.244763	0.321583
				0.704	97.6106	82.5536		0.23724	0.119071
				0.706	97.7876	82.5536		0.286023	0.415926
				0.708	97.7876	82.6511		0.53676	0.364585
				0.71	97.7876	82.6511		0.0277212	0.304127
				0.712	97.8761	83.0409		-0.0189437	0.479377
				0.714	97.8761	83.1384		0.261745	0.374901
				0.716	97.9646	83.3333		0.155581	0.265226
				0.718	98.0531	83.3333		0.324023	0.114922
				0.72	98.1416	83.5283		0.166473	0.0619728
				0.722	98.1416	83.5283		0.289814	0.185424
				0.724	98.1416	83.7232		0.161777	-0.155426
				0.726	98.1416	83.8207		0.0813864	0.681828
				0.728	98.1416	83.8207		0.128172	0.363263
				0.73	98.2301	83.8207		0.507903	0.567177
				0.732	98.2301	84.0156		0.220266	0.696304
				0.734	98.2301	84.0156		0.566132	0.457598
				0.736	98.2301	84.0156		0.301692	0.312143
				0.738	98.2301	84.1131		0.414319	0.510438
				0.74	98.2301	84.308		0.353948	0.639306
				0.742	98.2301	84.6979		0.262597	0.576572
				0.744	98.2301	84.7953		0.253304	0.763955
				0.746	98.4071	84.7953		0.590359	0.716082
				0.748	98.4071	84.7953		0.325665	0.59872
				0.75	98.5841	84.7953		0.261006	0.547339
				0.752	98.5841	84.8928		0.0278483	0.614502
				0.754	98.5841	85.0877		0.219552	0.531145
				0.756	98.5841	85.3801		-0.00118251	0.314777
				0.758	98.5841	85.4776		0.12322	0.0858512
				0.76	98.5841	85.77		0.230011	0.294246
				0.762	98.5841	86.0624		0.427002	0.219643
				0.764	98.6726	86.2573		0.0586434	0.180748
				0.766	98.6726	86.3548		0.390255	0.152101
				0.768	98.6726	86.5497		0.138044	0.261326
				0.77	98.6726	86.6472		0.284526	0.258332
				0.772	98.6726	86.6472		0.267026	0.278522
				0.774	98.6726	86.8421		0.244632	0.236361
				0.776	98.6726	86.8421		0.204422	0.266755
				0.778	98.6726	86.9396		0.210044	0.148535
				0.78	98.6726	87.037		-0.0166823	0.265389
				0.782	98.6726	87.3294		0.194539	0.0676016
				0.784	98.6726	87.3294		0.40981	0.255844
				0.786	98.6726	87.3294		0.152811	0.289343
				0.788	98.6726	87.4269		0.332013	0.311637
				0.79	98.8496	87.6218		0.132134	-0.0387069
				0.792	98.8496	87.8168		0.1978	0.322411
				0.794	98.8496	87.9142		0.338259	0.352682
				0.796	98.8496	87.9142		0.47005	0.246315
				0.798	98.9381	87.9142		0.263622	0.224098
				0.8	98.9381	87.9142		0.113944	0.25902
				0.802	99.115	88.0117		-0.09939	0.243947
				0.804	99.115	88.0117		0.0799257	0.291286
				0.806	99.115	88.1092		0.404339	0.28311
				0.808	99.115	88.3041		0.482118	0.206127
				0.81	99.292	88.3041		0.508618	0.271831
				0.812	99.292	88.3041		0.492212	0.184516
				0.814	99.292	88.3041		0.399945	0.134217
				0.816	99.3805	88.4016		0.204583	0.172279
				0.818	99.469	88.4016		0.0779926	0.198609
				0.82	99.469	88.499		0.167703	-0.00245854
				0.822	99.469	88.694		0.214325	-0.217662
				0.824	99.469	88.7914		0.190842	0.0380038
				0.826	99.469	88.7914		0.0886276	0.298975
				0.828	99.469	88.7914		0.203605	0.26329
				0.83	99.469	88.7914		-0.0102063	0.0936419
				0.832	99.469	88.8889		0.0849868	0.088484
				0.834	99.469	88.9864		0.157324	0.140424
				0.836	99.469	88.9864		0.103749	0.0455568
				0.838	99.469	89.1813		-0.00792131	0.142571
				0.84	99.469	89.1813		0.0678694	0.23
				0.842	99.469	89.2788		0.358923	0.158932
				0.844	99.469	89.2788		0.231552	0.0146921
				0.846	99.469	89.3762		0.244032	0.249012
				0.848	99.5575	89.3762		0.368117	0.109032
				0.85	99.5575	89.5712		0.0816508	0.155397
				0.852	99.5575	89.961		0.0821109	-0.54521
				0.854	99.5575	90.1559		0.383565	-0.393542
				0.856	99.5575	90.3509		0.274505	0.754096
				0.858	99.5575	90.4483		0.317755	0.762117
				0.86	99.5575	90.5458		0.157988	0.664737
				0.862	99.5575	90.5458		0.39353	0.61362
				0.864	99.5575	90.5458		0.189006	0.043347
				0.866	99.5575	90.6433		0.280489	-0.42679
				0.868	99.5575	90.9357		0.251327	1
				0.87	99.5575	91.0331		0.163778	1
				0.872	99.5575	91.0331		0.366717	0.668002
				0.874	99.5575	91.0331		0.483346	0.787764
				0.876	99.5575	91.0331		0.213408	0.630107
				0.878	99.5575	91.0331		0.211709	1
				0.88	99.5575	91.1306		0.0461587	1
				0.882	99.5575	91.2281		0.146699	1
				0.884	99.5575	91.3255		0.131191	0.690819
				0.886	99.5575	91.3255		0.00316346	0.739665
				0.888	99.5575	91.423		-0.16658	0.20037
				0.89	99.5575	91.5205		0.140732	0.758923
				0.892	99.5575	91.5205		0.07333	0.782165
				0.894	99.5575	91.6179		0.181957	0.632813
				0.896	99.646	91.7154		0.0723758	0.202302
				0.898	99.646	91.7154		0.0559325	0.221265
				0.9	99.646	91.8129		0.299478	0.208722
				0.902	99.646	92.0078		0.217171	0.142138
				0.904	99.646	92.0078		0.264524	0.175
				0.906	99.646	92.2027		0.196279	0.215764
				0.908	99.646	92.2027		0.225355	0.851081
				0.91	99.646	92.2027		0.183535	0.180221
				0.912	99.7345	92.2027		0.23199	0.338967
				0.914	99.7345	92.2027		0.10753	0.318416
				0.916	99.7345	92.4951		0.552447	0.210546
				0.918	99.7345	92.5926		0.329999	0.141114
				0.92	99.7345	92.6901		0.356964	0.0670786
				0.922	99.7345	92.7875		0.0124212	0.054072
				0.924	99.7345	92.7875		-0.0241595	0.369277
				0.926	99.7345	92.7875		0.189526	0.380886
				0.928	99.7345	92.885		0.189328	0.106573
				0.93	99.7345	92.9825		0.335279	0.11647
				0.932	99.7345	92.9825		0.693193	0.24453
				0.934	99.7345	93.2749		0.523558	0.204788
				0.936	99.7345	93.2749		0.0732242	-0.086218
				0.938	99.7345	93.3723		0.214382	0.209247
				0.94	99.7345	93.3723		0.256744	-0.156276
				0.942	99.7345	93.5673		0.580541	0.253766
				0.944	99.7345	93.5673		-0.0814582	0.339298
				0.946	99.7345	93.7622		0.209328	0.346444
				0.948	99.7345	93.8596		0.0541091	0.255635
				0.95	99.7345	93.9571		-0.0597474	-0.177465
				0.952	99.7345	94.0546		0.286668	0.0440357
				0.954	99.7345	94.0546		0.147222	0.00577547
				0.956	99.7345	94.0546		-0.164054	-0.0449516
				0.958	99.7345	94.0546		0.0499611	0.216903
				0.96	99.7345	94.0546		0.119055	-0.0747847
				0.962	99.7345	94.152		0.0981523	0.234363
				0.964	99.7345	94.347		0.167765	-0.0752848
				0.966	99.7345	94.4444		0.246252	0.173508
				0.968	99.7345	94.4444		0.0694011	0.119042
				0.97	99.823	94.5419		0.0506367	0.169256
				0.972	99.823	94.6394		0.244366	-0.0483425
				0.974	99.823	94.7368		0.065775	-0.0195634
				0.976	99.823	94.7368		0.359483	0.371903
				0.978	99.823	94.7368		0.203739	0.59549
				0.98	99.823	94.7368		0.229259	-0.0219876
				0.982	99.823	94.7368		0.117882	0.327779
				0.984	99.823	94.7368		-0.0421221	0.272728
				0.986	99.823	94.7368		0.043724	0.179217
				0.988	99.823	94.7368		0.273884	0.348948
				0.99	99.823	94.7368		0.332571	0.225269
				0.992	99.823	94.7368		0.322971	0.440564
				0.994	99.823	94.8343		0.214808	0.466134
				0.996	99.823	94.8343		0.34227	0.460467
				0.998	99.823	94.9318		0.304884	0.420457
				1	100	100		0.381589	0.547352
								0.2162	0.383347
								0.0521894	0.482579
								-0.0972592	0.120415
								0.2922	0.255965
								0.243102	0.0849785
								0.282964	0.254108
								0.233138	0.246172
								0.274222	0.274053
								0.308846	0.496983
								-0.0615863	0.559604
								0.280805	0.490519
								0.0872334	0.512955
								0.148576	0.535277
								0.254532	0.511656
								0.328115	0.464439
								0.302809	0.48592
								0.12744	0.459619
								0.0338446	0.244002
								0.155934	0.10245
								0.173007	-0.0391553
								0.311484	-0.0707323
								0.23084	-0.0160808
								0.35008	-0.0626345
								0.1966	-0.0314356
								0.192336	0.334683
								0.0638183	-0.0333115
								0.377912	0.186385
								0.171257	0.526282
								0.232008	0.334206
								0.298418	0.320715
								0.1936	0.455539
								0.28469	0.472018
								0.165047	0.374293
								0.398661	0.458591
								0.5732	0.282969
								0.0277495	0.0355325
								0.00337816	0.527974
								0.0707589	0.0780535
								-0.0145691	0.124571
								0.223899	0.0393221
								0.370971	0.611566
								0.277991	0.0567627
								0.25496	0.566211
								0.135301	0.139974
								0.0711041	-0.0245681
								0.124625	0.690693
								0.278637	0.637382
								0.198661	0.126913
								0.174611	0.588058
								0.197318	0.644142
								0.0412963	0.649845
								0.506329	0.0116678
								0.011814	0.743979
								0.391786	0.704257
								0.282901	0.0636305
								0.040378	0.205218
								0.0241282	0.64619
								0.280103	0.0818556
								0.0768094	-0.00430518
								0.0903583	0.617506
								0.46793	0.637786
								0.224748	0.732315
								0.130044	0.657485
								0.207781	0.156242
								0.241305	0.214346
								0.214922	0.183472
								0.284326	0.135626
								0.079313	0.00501659
								0.177353	-0.0454075
								0.21851	0.579507
								0.173602	0.0279749
								0.282171	0.231235
								0.495039	0.259919
								0.36479	0.189814
								0.0100818	0.173738
								0.197151	0.240619
								0.185018	0.480599
								0.515298	0.189854
								0.186594	0.339473
								0.260045	0.147062
								0.30762	0.228343
								0.353332	-0.0878399
								0.47755	-0.135431
								0.184203	0.237206
								0.0797282	0.282923
								0.30854	0.173563
								0.137681	0.118292
								0.622486	0.0781793
								0.206963	0.174128
								0.427195	0.115307
								0.362188	0.207611
								0.149548	0.303845
								0.377589	0.367904
								0.0560645	0.409602
								0.240429	0.711098
								-0.00825713	0.74033
								0.373388	0.52481
								0.150187	0.345311
								0.504202	0
								0.457842	0.252301
								0.123566	0.530235
								0.458817	0.867613
								0.12171	0.75108
								0.457034	0.973976
								0.205181	0.948504
								0.452538	0.854382
								0.41352	0.998818
								0.138916	0.961334
								0.245633	0.529279
								0.501135	0.568628
								-0.106542	0.530904
								0.422368	0.79287
								0.316307	0.657985
								0.458637	0.715645
								0.369693	0.195036
								0.467706	0.210998
								0.446464	0.152318
								0.344291	0.552712
								0.160274	0.234111
								0.602418	0.209009
								0.460219	0.197139
								0.520809	0.218954
								0.179379	0.0357419
								0.19828	0.154017
								0.244835	0.141732
								0.0405737	0.363463
								0.225041	0.117458
								0.00330118	0.160621
								0.299434	0.103893
								0.171009	0.200298
								0.171894	0.219968
								0.037976	0.174804
								0.45888	0.19813
								0.442694	0.172064
								0.5229	0.256075
								0.217064	0.294031
								0.534286	0.235898
								0.403424	0.0997204
								-0.0294853	0.0928635
								0.254434	0.533458
								0.287648	0.182634
								0.463462	0.165464
								0.454794	0.141585
								0.297726	0.0352709
								0.0649883	0.543123
								0.140947	0.33184
								0.969234	0.466696
								0.675254	0.394244
								0.223123	0.361231
								-0.0307268	0.503495
								-0.0648679	0.563024
								-0.0740182	1
								0.749473	0.964658
								0.657942	0.163883
								0.407361	0.207249
								0.323029	0.17936
								0.133608	0.35023
								0.209974	0.353366
								0.289629	0.546871
								0.60017	0.846185
								0.185256	0.381256
								0.0624548	1
								0.424099	1
								0.024732	0.417603
								0.467737	0.0716223
								0.297012	0.162384
								-0.0162918	0.174676
								0.284118	0.405967
								-0.0294318	0.640271
								0.411202	0.867622
								0.296987	1
								0.183824	1
								0.28075	0.922869
								0.298741	0.851077
								0.204909	0.738233
								0.230373	0.474655
								0	0.316739
								-0.0309929	0.641338
								0	0.2451
								0.337844	0.639331
								0.107737	0.816932
								0.0468902	0.437295
								0.0556641	0.884242
								0.0655483	0.832315
								0.0427462	0.808179
								0.00471391	0.782424
								0.120016	0.689675
								0.0947087	0.378303
								0.122088	0.344639
								0.00349589	0.43686
								0.104934	0.449383
								0.255303	0.424841
								0.0792166	0.43598
								0.326059	0.915709
								0.35208	0.779091
								0.147153	0.76144
								0.295684	0.724474
								0.476276	0.306193
								-0.0619495	0.310699
								0.203038	0.371547
								0.146958	0.339806
								0.0492497	0.964237
								0.117896	0.850591
								0.228065	0.485375
								0.254627	0.358697
								0.479182	0.153278
								0.245726	0.240887
								0.339382	0.233029
								0.405604	0.273666
								0.159248	0.315836
								0.135915	0.915925
								0.142799	0.759593
								0.0470582	0.661367
								0.272417	0.69459
								0.126875	0.451876
								0.352486	0.232796
								0.205937	0.160535
								0.0375975	0.226142
								0.197656	0.371585
								0.474903	0.159057
								0.0229178	0.239939
								0.0170238	0.283656
								0.254338	0.361142
								0.145349	0.134986
								0.447267	0.254972
								0.32695	0.364654
								0.164557	0.392935
								0.139566	0.12056
								0.105066	0.55981
								0.438164	0
								0.462703	1
								-0.00848928	0.51944
								0.0197074	0.54635
								0.221611	1
								0.202558	1
								0.300984	0.566112
								0.0867412	0.639242
								0.220306	1
								0.204221	1
								0.14708	0.525588
								0.087984	0.644449
								-0.00585329	0.422305
								0.171508	1
								0.19718	0.592447
								0.182698	0.664964
								0.426051	0
								0.319702	1
								0.202526	0.592763
								0.191675	0.555387
								0.105439	0.413021
								0.134032	0.413086
								0.178245	0
								0.578887
								0.359251
								0.289368
								0.158069
								0.151775
								0.354675
								0.359122
								0.329447
								0.343108
								0.296816
								0.246379
								0.158789
								0.185858
								0.347622
								0.610195
								0
								0.281984
								0.666872
								0.332278
								0.124592
								-0.00502895
								0.412031
								0.0366978
								0.297194
								0.36451
								0.4372
								0.599181
								0.0721021
								0.896453
								0.568517
								-0.0832365
								-0.00156614
								0.109136
								0.314177
								0.418327
								0.516819
								0.378195
								0.0390304
								0.383801
								0.382293
								0.192422
								0.298171
								0.299763
								0.669101
								0.163302
								-0.142409
								0.0759665
								0.284123
								0.162437
								0.173948
								-0.0141324
								0.270454
								0.0841097
								0.0927898
								0.490803
								0.382999
								0.274268
								0.232108
								0.154499
								0.104117
								0.501378
								0.719167
								0.314516
								0.254296
								0.320605
								0.345286
								-0.0109232
								0.146677
								0.518765
								0.176933
								0.243918
								0.105265
								0.315849
								0.162501
								0.187768
								0.0642491
								0.104164
								-0.036188
								0.681002
								0.706821
								0.603547
								0.790708
								0.664481
								0.729055
								-0.0444988
								0.71858
								0.809707
								0.80129
								0.798353
								0.71144
								0.617938
								0.7631
								0.716543
								0.810651
								0.815156
								0.790011
								0.576648
								0.699506
								0.84889
								0.802778
								0.817211
								0.745245
								0.647659
								0.705274

## Sheet: Fig 6
Fig 6B,6D				Fig 6E,6F													Fig 6G,6H
cell number	bhlhe22+ Acs	sox2+ Acs		bar width:2,bhlhe22+ Acs	bar width:5,bhlhe22+ Acs	bar width:10,bhlhe22+ Acs	bar width:2,sox2+ ACs	bar width:5,sox2+ ACs	bar width:10,sox2+ ACs	bar width10,bhlhe22+ Acs	bar width:50,bhlhe22+ Acs	bar width:250,bhlhe22+ Acs	bar width:10,sox2+ ACs	bar width:50,sox2+ ACs	bar width:250,sox2+ ACs		Fish name	bar width:2,bhlhe22+ Acs	bar width:5,bhlhe22+ Acs	bar width:10,bhlhe22+ Acs	bar width:2,sox2+ ACs	bar width:5,sox2+ ACs	bar width:10,sox2+ ACs	bar width10,bhlhe22+ Acs	bar width:50,bhlhe22+ Acs	bar width:250,bhlhe22+ Acs	bar width:10,sox2+ ACs	bar width:50,sox2+ ACs	bar width:250,sox2+ ACs
Responsive	138	138		0.276282	0.297088	0.395783	0.250807	0.28334	0.235497	0.195899	0.326184	0.301152	0.085234	0.155714	0.224768		221018_Fish2	0.444444	0.777778	1
Non-responsive	256	385		0.157358	0.47193	1.01567	0.119902	0.210652	0.111361	0.363541	0.707784	0.831293	0.144511	0.202266	0.176612		221018_Fish3	0	1	1
				0.259288	0.410426	0.508459	0.164309	0.155933	0.222726	0.288294	0.310001	0.428547	0.163656	0.197025	0.20506		221018_Fish4	0.333333	0.333333	1
				0.128653	0.10227	0.216469	0.233874	0.160347	0.148629	0.196679	0.267187	0.383543	0.208116	0.426974	0.389965		221019_Fish1	0	0	1
				0.184433	0.903774	0.992894	0.159366	0.181773	0.308777	0.191383	0.346744	0.454497	0.140522	0.226328	0.30072		221019_Fish2	0.5	0.5	1
				0.11315	0.13353	0.233236	0.137793	0.314717	0.128754	0.200866	0.399449	0.538678	0.166562	0.147628	0.248871		221019_Fish3	0	1	1
				0.29602	0.646101	0.980456	0.32846	0.152681	0.115227	0.302652	0.742875	0.785656	0.152253	0.211582	0.24644		221019_Fish4	0	0.666667	1
				0.280455	0.365674	0.409771	0.13491	0.242246	0.15212	0.132225	0.183822	0.277698	0.363432	0.136895	0.271347		221019_Fish6	0	0	1
				0.14517	0.229247	0.410178	0.180473	0.202199	0.249116	0.080968	0.353945	0.111301	0.183533	0.303875	0.114259		221021_Fish1	1	0.333333	0.666667
				0.137572	0.248613	0.386175	0.107329	0.12667	0.200395	0.103639	0.194869	0.355118	0.165494	0.231682	0.216149		221021_Fish2	0	0	1
				0.0771142	0.130874	0.237505	0.14622	0.140512	0.217796	0.115893	0.139849	0.222193	0.145032	0.247794	0.113224		221021_Fish4	0.2	0.2	1
				0.19656	0.0740325	0.246658	0.249763	0.304671	0.198824	0.145942	0.177424	0.247047	0.101811	0.161894	0.202505		221021_Fish5	0	0	1
				0.221793	0.30045	0.294202	0.143088	0.148673	0.20859	0.444184	0.769044	0.914017	0.18052	0.165917	0.22371		221021_Fish6	0	0	1
				0.0643222	0.154473	0.220859	0.280294	0.232008	0.088284	0.243113	0.512856	0.767317	0.173887	0.210664	0.094978		221021_Fish7	0	0.333333	1
				0.386336	0.30066	0.28597	0.310604	0.285297	0.405857	0.284042	0.183376	0.162548	0.386326	0.434365	0.363092		220906_Fish1							0.666667	1	1
				0.16072	0.162696	0.468143	0.193647	0.142531	0.200873	0.144316	0.230168	0.237924	0.235668	0.281125	0.324894		220906_Fish2							0.4375	0.625	0.8125
				0.185848	0.314373	0.336105	0.115521	0.138044	0.308499	0.12443	0.218643	0.288837	0.116457	0.167872	0.204982		220906_Fish3							0.375	0.625	0.875
				0.148413	0.221367	0.248711	0.233094	0.327528	0.198981	0.20096	0.51922	0.877236	0.178658	0.16727	0.206614		220907_Fish1							0.727273	0.818182	1
				0.0979215	0.191613	0.429746	0.328208	0.499206	0.472737	0.203721	0.145217	0.193553	0.173479	0.258102	0.259288		220907_Fish2							0.142857	0.571429	0.857143
				0.108698	0.272495	0.357843	0.147103	0.178715	0.268152	0.122874	0.157316	0.283729	0.125694	0.305951	0.203103		220907_Fish3							0.090909	0.636364	0.909091
				0.113663	0.412402	0.602166	0.125357	0.340655	0.25287	0.146003	0.193969	0.261595	0.206303	0.22512	0.20113		220911_Fish1							0.571429	0.785714	1
				0.100284	0.127227	0.302081	0.166812	0.196156	0.267482	0.128116	0.149982	0.221082	0.115007	0.143991	0.219144		220911_Fish2							0.5	0.9	1
				0.307037	0.249161	0.363226	0.230534	0.159029	0.245707	0.591095	0.699656	0.886306	0.098194	0.161046	0.218493		220911_Fish3							0.5	0.75	0.75
				0.219562	0.156211	0.464519	0.156343	0.155646	0.221747	0.197439	0.290453	0.306335	0.157348	0.162748	0.235087		220911_Fish4							0.285714	0.714286	1
				0.282803	0.176789	0.151567	0.307705	0.18285	0.216219	0.210935	0.248511	0.320869	0.259631	0.286882	0.480617		221016_Fish2				0.333333	0.5	0.5
				0.139488	0.187731	0.23231	0.446234	0.182323	0.158792	0.280995	0.369729	0.599497	0.146918	0.19282	0.246675		221016_Fish3				0.5	0.5	0
				0.104808	0.14344	0.46141	0.139886	0.261183	0.231695	0.136437	0.324993	0.151053	0.163519	0.16315	0.244102		221016_Fish4				0	0.5	1
				0.0849315	0.113205	0.295605	0.234876	0.193922	0.270426	0.170916	0.280546	0.285595	0.171188	0.213427	0.409796		221017_Fish1				0	0	1
				0.277272	0.19784	0.414254	0.242475	0.491789	0.177503	0.616714	0.907806	0.989739	0.104582	0.172772	0.277718		221017_Fish2				0.5	0.5	0.5
				0.0896575	0.133552	0.247675	0.179538	0.10646	0.291548	0.283397	0.410622	0.435121	0.1374	0.142771	0.274693		221017_Fish3				0.666667	0.666667	0.666667
				0.138719	0.254549	0.518423	0.197863	0.206776	0.10883	0.278167	0.38662	0.527536	0.16789	0.216189	0.273649		221017_Fish4				0	0	1
				0.115283	0.168142	0.223691	0.12352	0.105524	0.305525	0.453657	0.967607	1.0455	0.152005	0.15095	0.263828		221017_Fish6				1	1	0
				0.123526	0.120057	0.355126	0.249323	0.112866	0.242498	0.217179	0.141129	0.222049	0.148079	0.218542	0.232222		221020_Fish2				0.333333	0.333333	1
				0.184437	0.164019	0.271554	0.170206	0.360391	0.467333	0.364106	0.302625	0.437165	0.238367	0.22812	0.2178		221020_Fish4				0.555556	0.333333	0.666667
				0.124093	0.214891	0.246649				0.317025	0.472549	0.400032	0.16714	0.257742	0.28473		221020_Fish6				0	1	1
				0.186929	0.248277	0.220518				0.244089	0.383585	0.844135	0.16818	0.165548	0.221521		220916_Fish2										0	0.5	0.5
				0.144152	0.179944	0.318498				0.158931	0.214311	0.224649	0.134895	0.303527	0.33284		220916_Fish3										0.333333	0.5	1
				0.0868776	0.168969	0.217859				0.146558	0.181562	0.220423	0.139506	0.185687	0.281519		220919_Fish1										0	1	0.333333
				0.0991652	0.154407	0.222148				0.124467	0.16249	0.212584	0.131158	0.16042	0.201678		220919_Fish3										0	0	1
				0.168505	0.12557	0.238959				0.164586	0.442928	0.779553	0.117811	0.208293	0.294293		220919_Fish4										0.375	0.75	0.875
										0.125616	0.12214	0.205228	0.131923	0.194641	0.295156		220920_Fish1										0.125	0.458333	1
										0.125975	0.144411	0.269951	0.120961	0.169348	0.24406		220920_Fish2										0	0.166667	1
										0.173539	0.60405	0.584792	0.1151	0.215295	0.30929		220920_Fish3										0.5	0	0.5
										0.15342	0.28643	0.71152	0.290113	0.207423	0.295651		220920_Fish4										0	1	1
										0.144103	0.193439	0.28723	0.163457	0.257134	0.376167		220923_Fish1										0	0.2	1
										0.353604	0.584825	0.707764	0.109213	0.110414	0.221875		220923_Fish2										0.8	1	1
										0.109273	0.200036	0.268071	0.130309	0.161088	0.295754		220923_Fish3										0	0.333333	1
										0.174256	0.209807	0.156338	0.151713	0.309598	0.39751		220925_Fish1										0.153846	0.769231	0.846154
										0.202612	0.216481	0.207947	0.124363	0.17985	0.219603		220925_Fish4										0.333333	0.666667	1
										0.161499	0.174214	0.213658	0.151997	0.19514	0.221347		220926_Fish1										0.1	0.6	0.8
										0.145434	0.188441	0.201759	0.177378	0.150812	0.224859		220926_Fish3										0.142857	0.285714	1
										0.1321	0.200604	0.166508	0.12325	0.178328	0.237066
										0.191738	0.275754	0.402637	0.23072	0.099098	0.138232
										0.14117	0.145817	0.286251	0.150723	0.409427	0.259756
										0.130926	0.239178	0.367219	0.16237	0.233668	0.267279
										0.171346	0.277027	0.213147	0.142331	0.190867	0.233789
										0.881699	0.8862	1.03796	0.104337	0.18851	0.28272
										0.139347	0.1672	0.221289	0.088505	0.124787	0.242867
										0.12528	0.198759	0.229223	0.124753	0.277018	0.230177
										0.113503	0.121289	0.226465	0.104969	0.180765	0.209246
										0.196809	0.232163	0.279511	0.265741	0.274172	0.406012
										0.14652	0.261131	0.159946	0.195431	0.239198	0.254705
										0.148377	0.250513	0.315539	0.31186	0.321693	0.401436
										0.21133	0.168739	0.479485	0.211378	0.37045	0.313173
										0.687308	0.676525	0.483792	0.450757	0.34062	0.396075
										0.703156	0.594351	0.915251	0.124677	0.181597	0.242799
										0.134644	0.214877	0.256236	0.178774	0.275818	0.319016
										0.17607	0.238986	0.306399	0.116333	0.146706	0.233657
										0.254597	0.578288	0.941994	0.188629	0.239897	0.221982
										0.175463	0.259461	0.291531	0.144531	0.148937	0.259833
										0.465178	0.497981	0.556204	0.179126	0.232599	0.227489
										0.249456	0.188093	0.223932	0.155849	0.205458	0.29376
										0.233625	0.274859	0.263867	0.15079	0.228337	0.187553
										0.142814	0.215569	0.200307	0.156869	0.242302	0.323094
										0.137287	0.200514	0.293861	0.170798	0.18546	0.317355
										0.191505	0.181985	0.249413	0.154075	0.169205	0.224352
										0.468099	0.73422	0.874132	0.151036	0.203065	0.299691
										0.297243	0.534102	0.501142	0.21344	0.260661	0.317166
										0.159795	0.199464	0.271359	0.134659	0.202048	0.200785
										0.286171	0.473857	0.637563	0.228354	0.260129	0.444218
										0.181962	0.26417	0.246039	0.156385	0.212378	0.182356
										0.360547	0.224643	0.232256	0.211861	0.248835	0.351676
										0.166368	0.238499	0.232833	0.139902	0.139845	0.239007
										0.112039	0.207853	0.295035	0.156334	0.191758	0.243719
										0.279458	0.531666	0.914541	0.186402	0.285055	0.286016
										0.541406	0.656831	0.710458	0.137889	0.331577	0.44442
										0.176523	0.421052	0.486469	0.207517	0.239609	0.268655
										0.168798	0.216802	0.160191	0.142971	0.243705	0.269521
										0.131346	0.168162	0.233085	0.156256	0.189596	0.278308
										0.219523	0.284175	0.440167	0.135947	0.266151	0.178482
										0.31541	0.395089	0.467899	0.13779	0.229302	0.318064
										0.134859	0.281453	0.415097	0.156761	0.228059	0.291498
										0.214807	0.611709	0.958131	0.142807	0.194192	0.253638
										0.102408	0.130873	0.21832	0.116775	0.190749	0.268681
										0.409184	0.716483	1.02185	0.205602	0.227352	0.147393
										0.107396	0.136039	0.210883	0.138112	0.138655	0.379147
										0.14697	0.265393	0.345932	0.173221	0.211962	0.250283
										0.141748	0.230431	0.308372	0.269545	0.24288	0.28229
													0.118769	0.157191	0.20275
													0.158401	0.195106	0.258277
													0.139538	0.261779	0.337292
													0.135401	0.132805	0.238669
													0.116986	0.136671	0.252198
													0.12274	0.18759	0.259831

## Sheet: Fig S1
Fig S1I
	sox2+ isl1a+ AC	sox2+ isl1a+ dAC	sox2+ isl1a- AC	sox2+ isl1a- dAC
Fish 1	0.333333	0.416667	0.166667	0.0833333
Fish 2	0.25	0.666667	0	0.0833333
Fish 3	0.294118	0.588235	0	0.117647
Fish 4	0.368421	0.526316	0.0526316	0.0526316
Fish 5	0.333333	0.533333	0	0.133333
	0.315841	0.546244	0.0438596	0.0940557

## Sheet: Fig S2
Fig S2D
ChAT+ bhlhe22+ Acs(mm2)			ChAT+ sox2+ Acs(mm2)			ChAT+ bhlhe22- sox2- Acs(mm2)
control	sox2 sgRNA	bhlhe22/bhlhe23 sgRNA	control	sox2 sgRNA	bhlhe22/bhlhe23 sgRNA	control	sox2 sgRNA	bhlhe22/bhlhe23 sgRNA
1250	1750	0	4250	0	5000	500	1250	750
750	1250	0	3000	0	4750	1250	250	1500
1250	1000	0	3250	0	4250	1250	500	1500
1250	1250	0	4500	0	7750	0	1250	1000
1250	1500	0	3250	0	3500	1000	0	1750
1250	1500	0	3000	0	5750	1000	0	1250
2000		0	4500		4500	1750		1000
1500		0	4500		2750	750		2750
1250		0	2750		3000	1500		1750
1000			4750			750
Fig S2E
control(%)			sox2 sgRNA(%)			bhlhe22/bhlhe23 sgRNA(%)
ChAT+ bhlhe22- sox2- ACs	ChAT+ bhlhe22+ ACs	ChAT+ sox2+ ACs	ChAT+ bhlhe22- sox2- ACs	ChAT+ bhlhe22+ ACs	ChAT+ sox2+ ACs	ChAT+ bhlhe22- sox2- ACs	ChAT+ bhlhe22+ ACs	ChAT+ sox2+ ACs
0.0833333	0.208333	0.708333	0.416667	0.583333	0	0.130435	0	0.869565
0.25	0.15	0.6	0.166667	0.833333	0	0.24	0	0.76
0.217391	0.217391	0.565217	0.333333	0.666667	0	0.26087	0	0.73913
0	0.217391	0.782609	0.5	0.5	0	0.114286	0	0.885714
0.181818	0.227273	0.590909	0	1	0	0.333333	0	0.666667
0.190476	0.238095	0.571429	0	1	0	0.178571	0	0.821429
0.212121	0.242424	0.545455				0.181818	0	0.818182
0.111111	0.222222	0.666667				0.5	0	0.5
0.272727	0.227273	0.5				0.368421	0	0.631579
0.115385	0.153846	0.730769
0.153837	0.209747	0.636416	0.236111	0.763889	0	0.256415	0	0.743585

## Sheet: Fig S3
Fig S3B
Cell number	Fish	GS+ Cells	Glycinergic Cells	sox2+ ACs	sox2+ MCs
sox2 sgRNA	Fish 1	13	38	2	0
	Fish 2	9	27	0	0
	Fish 3	8	41	0	0
	Fish 4	11	31	0	0
	Fish 5	13	28	1	0
	Fish 6	12	31	0	0
	Fish 7	12	32	0	0
	Fish 8	11	36	0	0
	Fish 9	10	31	0	0
	Fish 10	12	35	0	0
	Fish 11	9	29	0	0
	Fish 12	14	24	0	0
	Fish 13	19	30	0	0
	Fish 14	15	32	0	0
	Fish 15	8	27	0	0
	Fish 16	9	21	0	0
	Fish 17	15	24	0	0
control sgRNA	Fish 1	11	35	23	3
	Fish 2	10	31	26	8
	Fish 3	12	34	27	12
	Fish 4	13	29	28	13
	Fish 5	15	32	34	14
	Fish 6	6	29	20	4
	Fish 7	8	36	25	8
	Fish 8	9	30	24	9
Fig S3D
	cell fraction	PRs	HCs	BCs	ACs	dACs	RGCs
control sgRNA	Fish 1	0.138158	0.0855263	0.223684	0.197368	0.0526316	0.302632
	Fish 2	0.194118	0.0705882	0.347059	0.147059	0.0294118	0.211765
	Fish 3	0.126582	0.0949367	0.310127	0.177215	0.0506329	0.240506
	Fish 4	0.133803	0.0915493	0.330986	0.133803	0.0492958	0.260563
	Fish 5	0.147239	0.0674847	0.331288	0.159509	0.0552147	0.239264
	Fish 6	0.135802	0.0802469	0.320988	0.191358	0.0679012	0.203704
	Fish 7	0.134615	0.0833333	0.269231	0.224359	0.0448718	0.24359
	Fish 8	0.141104	0.0797546	0.306748	0.208589	0.0674847	0.196319
		0.143928	0.0816775	0.305014	0.179908	0.0521806	0.237293
bhlhe22/bhlhe23 sgRNA	Fish 1	0.178218	0.0891089	0.326733	0.138614	0.0445545	0.222772
	Fish 2	0.164634	0.0853659	0.310976	0.134146	0.054878	0.25
	Fish 3	0.171598	0.0828402	0.390533	0.16568	0.0473373	0.142012
	Fish 4	0.126437	0.0804598	0.333333	0.155172	0.0632184	0.241379
	Fish 5	0.114754	0.0765027	0.31694	0.163934	0.0601093	0.26776
	Fish 6	0.137931	0.0804598	0.350575	0.149425	0.045977	0.235632
		0.148929	0.0824562	0.338181	0.151162	0.0526791	0.226593
sox2 sgRNA	Fish 1	0.160839	0.0769231	0.356643	0.181818	0.013986	0.20979
	Fish 2	0.149254	0.0970149	0.343284	0.164179	0	0.246269
	Fish 3	0.233129	0.104294	0.325153	0.141104	0.00613497	0.190184
		0.181074	0.0927442	0.341693	0.162367	0.00670699	0.215414

## Sheet: Fig S5
Fig S5C			Fig S5D			Fig S5F			Fig S5G					Fig S5H
bhlhe22-peak amplitude(dF/F0)	sox2-peak amplitude(dF/F0)		bhlhe22-Response Latency	sox2-Response Latency		bhlhe22-DS roi-response(dF/F0)	sox2-DS roi-response(dF/F0)		bhlhe22-DSI-DS	bhlhe22-DSI-nonDS	sox2-DSI-DS	sox2-DSI-nonDS		bhlhe22-DS roi-prefential direction(rad)	sox2-DS roi-prefential direction(rad)	Bin Center(preferential direction/rad)	bhlhe22-DS roi-number of value	sox2-DS roi-number of value
0.860456	0.469995		0.9207	0.93024		1.59349	0.469995		0.519287	-0.0338488	0.820161	-0.118445		1.08664	5.60989	0.2618	4	12
1.0939	0.514423		3.62142	2.20932		1.0019	0.514423		0.51699	0.316258	0.623299	0.143001		1.3975	5.55395	0.7854	2	39
1.76069	0.583867		2.57796	2.7132		1.88807	0.459138		0.670807	0.102291	0.742085	0.245265		3.07763	5.48343	1.309	10	30
1.77941	0.459138		1.71864	1.48176		2.16228	0.541906		0.606117	0.179557	0.638663	0.159397		2.96947	5.39929	1.8326	4	24
1.59349	0.541906		2.88486	0.98784		0.539834	0.503906		0.65915	0.177916	0.7414	0.178229		5.21184	4.91921	2.3562	8	21
1.5662	0.569944		3.3759	1.82933		0.211448	0.4499		0.911066	0.0589113	0.756831	0.0991683		3.64768	4.89629	2.8798	17	4
1.43521	0.503906		2.82348	1.02443		0.447237	0.535645		0.503451	-0.012261	0.519177	0.467063		5.63004	5.72365	3.4034	27	17
1.39331	0.4499		3.3759	1.02443		0.367722	0.457953		0.671486	0.192491	0.719185	0.30152		3.18253	5.8056	3.927	6	16
1.0019	0.478348		2.63934	1.6464		0.342053	0.439686		1	0.314242	0.558585	0.476601		4.15198	5.47802	4.4506	7	20
1.38082	0.568571		2.39382	1.6464		0.487002	0.358635		0.56054	0.237204	0.531206	0.329652		4.59526	5.85419	4.9742	5	46
1.42859	0.535645		2.1483	1.0976		0.465012	0.52435		0.530942	0.270534	0.552661	0.383199		4.57961	5.10721	5.4978	2	82
1.71664	0.457953		1.10484	1.24395		0.431281	0.737383		0.502333	0.342486	0.517403	0.48595		5.16761	5.1695
1.7133	0.439686		2.7621	1.39029		0.409146	0.515762		1	0.0961109	0.621935	0.29159		1.46714	5.2081
2.14248	0.514197		0.98208	0.98784		0.401692	0.4365		0.750695	0.269689	0.636698	0.462743		1.42629	5.28017
2.45279	0.58894		2.88486	1.31712		0.20477	0.446298		0.537353	0.160363	0.791919	0.114911		4.147	5.10297
1.20268	0.358635		2.4552	1.02443		0.688251	0.683602		0.512008	0.204863	0.666992	0.362957		2.08634	5.07113
1.81113	0.403823		1.28898	1.82933		0.770658	0.568077		0.703302	0.31437	0.685059	0.466314		1.66132	2.0207
1.02331	0.668624		2.51658	1.86592		0.489482	0.58793		0.55587	0.271914	0.502685	0.159599		3.45437	1.98822
1.02579	0.52435		2.0723	1.5029		0.474758	0.586762		0.624474	0.22464	0.624383	0.159599		0.669075	2.17161
0.865883	0.498815		2.25515	1.82495		0.241444	0.581989		0.503126	0.418885	0.606208	-0.269131		2.46875	2.04205
0.892127	0.463082		2.1942	1.21663		0.425861	0.779825		0.519105	0.376437	0.777396	0.104624		2.37894	2.00435
0.73456	0.737383		2.0723	1.23453		0.332304	0.592902		0.588341	0.473565	0.841103	-0.211039		2.76207	2.05726
3.25139	0.515762		2.13325	0.96615		0.37557	0.639556		0.538595	0.395505	0.672339	0.255739		3.08299	2.10325
1.88807	0.456153		2.13325	1.95888		0.21964	0.619578		0.667151	0.328974	0.857852	0.442249		6.12193	1.87864
2.16228	0.4365		1.76755	1.95888		0.499392	0.696906		0.53671	0.329129	0.712553	0.183352		2.85771	2.07531
2.12468	0.446298		1.9504	1.81896		0.350002	0.710203		0.571309	0.109891	0.821008	0.455805		2.64667	1.99293
1.28724	0.683602		2.13325	2.05216		0.279688	0.752233		0.667514	0.222937	0.655522	0.285175		2.17259	2.01461
1.31793	0.454993		1.88945	2.17653		0.25183	0.959863		0.514069	-0.060809	0.682479	0.287817		1.46707	1.84491
1.22993	0.570381		1.9504	1.8656		0.270853	2.2754		0.6223	0.0633456	0.853883	0.469656		2.71271	4.65074
1.21309	1.02007		2.49895	1.224		0.211685	1.93633		0.698613	0.074996	0.919188	0.435273		0.256237	4.05506
0.379128	0.36818		2.438	1.3464		0.240637	1.79561		0.525969	0.111765	0.993548	0.186409		1.33735	4.13026
0.279425	0.363199		2.3161	2.05123		0.436802	1.59436		0.620322	0.315299	1	0.24683		0.292634	3.94942
0.30567	0.568077		1.8285	2.07095		0.404003	1.16884		0.746284	0.0510461	0.789719	0.387841		3.41866	5.03797
0.283926	0.58793		2.37705	2.13012		0.401053	0.813371		0.602647	0.219318	0.667513	0.489628		6.16592	4.78714
0.277858	0.564994		2.3161	1.33947		0.214841	0.880967		0.53676	0.129065	0.768682	0.248979		3.13944	5.34049
0.364422	0.586762		1.76755	1.58301		0.204737	0.557832		0.507903	0.112524	0.647898	0.468731		4.36137	5.30484
0.538572	0.581989		1.9504	1.52212		0.85757	1.12614		0.566132	0.19218	0.793463	0.173386		1.23978	5.67419
0.60106	0.779825		2.5599	1.46124		0.67468	0.923146		0.590359	0.195619	0.503967	-0.0465432		0.490415	5.58801
0.442261	0.592902		2.37705	1.88743		0.876167	0.784586		0.508618	0.156593	0.732942	0.185588		1.49597	5.01524
0.312674	0.639556		2.6818	1.70478		0.3187	0.714082		0.552447	0.095233	0.852574	0.281908		2.28246	4.9109
0.650424	0.619578		2.0723	1.2177		0.212037	1.40272		0.693193	0.203567	1	0.151379		1.93805	5.44791
0.587561	0.696906		2.49895	1.2177		0.365498	0.485439		0.523558	0.210315	0.759488	0.0949111		4.61946	4.93844
0.323543	0.710203		2.74275	1.03504		0.288454	1.16196		0.580541	0.149538	0.768287	0.0830353		1.81416	4.89125
0.485227	0.752233		2.13325	1.15681		0.625343	1.01525		0.5732	0.148511	0.896477	0.432372		5.71707	5.21698
0.582571	0.959863		1.88945	1.70478		0.400006	0.552656		0.506329	0.250317	0.942402	0.0696497		3.67962	5.52781
0.564778	1.47731		2.0723	1.76567		0.7504	0.758569		0.515298	0.0936299	0.805971	0.356839		4.22063	5.08697
0.482922	1.47731		2.3161	1.33947		0.297993	0.805249		0.622486	0.152903	0.659124	0.142723		4.99969	4.88925
0.437079	1.74226		2.3161	1.46124		0.356796	0.663249		0.504202	0.100159	0.951821	0.186733		2.31017	3.29925
0.352369	1.39141		2.438	1.09593		0.317753	0.860782		0.501135	0.204988	1	0.0929818		0.239004	3.65237
0.33137	2.2754		2.01135	0.97416		0.363265	3.22456		0.602418	0.132378	0.629815	-0.020872		5.0455	2.40016
0.421758	3.31595		2.3161	1.09593		0.331877	4.99766		0.520809	0.141346	0.566522	0.242318		0.874387	2.59903
0.472881	1.93633		2.49895	0.85239		0.463348	0.740904		0.5229	0.267339	0.966385	0.312514		2.91093	2.95304
0.657406	1.79561		2.37705	0.97416		0.742686	0.70432		0.534286	0.0856808	1	-0.105972		2.36953	3.00195
0.430457	2.66594		1.64565	0.97416		0.565938	0.649051		0.969234	0.146656	1	0.457871		2.86421	3.46295
0.528467	1.59436		2.0723	0.547965		0.734381	3.83802		0.675254	0.203565	0.549418	0.340367		3.51187	2.57245
0.701005	1.16884		2.1942	0.73062		0.536756	3.48731		0.749473	0.160296	0.574626	0.0419239		3.1409	2.43406
0.482146	0.914852		1.9504	0.547965		0.577811	1.07534		0.657942	0.203102	0.89911	0.12243		3.08387	3.52885
0.61481	0.813371		1.64565	0.85239		1.12751	3.73996		0.60017	0.0794536	0.593701	0.219401		4.11205	2.2859
0.678003	0.880967		2.27164	0.48708		0.363775	4.69062		0.578887	0.227487	0.572415	-0.15805		3.01049	1.66636
0.533788	0.629938		1.91296	0.97416		0.278536	2.13187		0.610195	0.123302	1	-0.195099		2.33791	1.29638
0.497999	0.557832		2.03252	0.913275		0.248391	0.921309		0.666872	0.0881914	0.855656	0.456517		1.44095	1.01823
0.748913	1.12614		1.91296	0.73062		0.27217	1.50316		0.599181	0.0773028	1	0.216719		1.48174	1.21647
0.591161	0.923146		1.61406	0.791505		0.232075	1.7337		0.896453	0.109386	1	0.10588		2.32756	1.19731
0.553221	0.784586		1.1956	0.97416		3.02355	1.56058		0.568517	0.352422	1	0.118646		3.76017	1.02972
0.670475	0.714082		1.97274	1.27859		2.20878	1.88976		0.516819	0.0821921	1	0.221654		4.24379	0.998583
0.667674	1.40272		1.99206	0.913275		1.65735	2.08924		0.669101	0.265914	1	0.323775		4.02072	1.25642
0.256923	0.976224		1.81629	1.22112		1.2525	0.329045		0.501378	0.166328	0.550027	0.225215		4.74589	0.563164
0.521418	0.597739		1.81629	1.49248		1.56977	4.28502		0.719167	0.0913663	0.915613	-0.0219664		4.42401	5.72861
0.567852	0.485439		2.16783	0.61056		0.481203	3.48239		0.518765	0.176023	0.879246	0.0307891		3.2393	5.63338
0.922912	1.16196		2.28501	1.96736		2.48836	3.77519		0.681002	0.164661	0.882176	0.334091		3.17585	5.48227
0.441918	1.01525		2.05065	0.65856		2.20885	2.64865		0.706821	0.10138	0.902728	-0.153168		3.57047	5.45983
0.765168	0.552656		1.93347	0.24514		2.30784	4.11799		0.603547	0.277261	0.97149	0.294047		3.30273	5.39817
0.262408	0.533263		1.28898	1.81104		1.87549	4.26978		0.790708	-0.0148779	0.938762	0.0773399		3.4111	5.63704
0.369404	0.481466		1.81629	2.03056		0.913772	2.49693		0.664481	0.220763	0.887021	0.391084		2.95434	5.26163
0.481091	0.758569		1.46475	2.1952		0.7166	4.62514		0.729055	0.494302	0.942262	0.402474		3.33789	5.63196
0.569841	0.805249		1.99206	1.9208		0.9921	4.74758		0.71858	0.266119	0.945057	0.225207		3.26183	5.61545
0.299625	0.616566		1.7577	1.24395		1.17545	2.99009		0.809707	0.186672	0.917286	0.275312		3.17285	5.53654
0.726131	0.608213		1.7577	1.24395		1.78605	4.89693		0.80129	0.0991124	0.62102	0.30736		3.3237	6.14585
0.607905	0.445766		1.81629	1.24395		1.94712	0.717188		0.798353	0.440106	0.552897	0.280779		3.23688	5.66926
0.450895	0.663249		1.09368	1.02443		1.51465	0.746072		0.71144	0.111144	0.714341	0.180062		3.33194	5.48017
0.528299	0.860782		1.69911	2.14032		1.2503	0.642222		0.617938	0.246593	0.852841	0.197132		3.35954	5.23687
0.509478	3.22456		2.22642	2.1952		1.14228	0.805296		0.7631	0.197225	0.661837	0.231157		3.09784	5.60937
0.714791	4.99766		1.34757	2.25008		1.49888	0.914412		0.716543	0.239309	0.623156	0.26125		3.31682	5.67551
0.396005	0.740904		1.81629	2.14032		1.71148	0.97985		0.810651	0.279878	0.572239	0.20124		3.43113	5.88857
0.463692	0.70432		1.58193	1.6464		1.55933	0.885542		0.815156	0.115777	0.761159	0.18754		3.25255	5.59422
0.548122	4.34437		1.93347	1.86592		1.3988	0.875353		0.790011	0.197578	0.83467	0.105325		3.34725	5.73161
0.514561	0.649051		2.16783	1.15248		1.18676	0.975112		0.576648	0.278407	0.603773	0.0534599		3.3265	5.89826
0.655313	3.83802		1.81629	1.24395		1.08112	0.93613		0.699506	0.124305	0.712414	0.239966		3.35706	5.92984
0.47586	3.48731		1.7577	1.0976		1.44605	0.983238		0.84889	0.390998	0.600849	0.00556261		3.44297	5.85544
0.715622	1.07294		1.7577	1.60981		1.9818	0.985307		0.802778	0.209555	0.563482	0.201197		3.03985	5.82154
0.677114	1.07534		2.369	1.46347		1.28938	2.23397		0.817211	0.215377	0.622769	0.245316		2.9573	5.01591
0.62966	3.73996		1.8952	2.25008		1.34311	1.51296		0.745245	0.44966	0.600444	0.291839		3.33077	1.87854
0.626679	4.69062		2.30978	2.1952		1.03912	1.57215		0.647659	-0.0580283	0.789755	0.115952		3.44753	1.29497
0.556031	0.796361		1.83597	1.97568		0.910373	1.79184		0.705274	0.221724	0.62029	0.347859		3.28292	5.08561
0.619078	0.653647		1.83597	1.75616			1.86857			0.42864	0.624738	0.39484			5.51942
0.666613	2.13187		1.95443	1.59152			1.25963			0.14428	0.755543	-0.133299			1.85381
0.459937	0.921309		2.25055	1.70128			1.5455			0.218047	0.673113	0.0131972			1.98772
0.383177	1.50316		2.01365	1.20736			1.89306			0.269205	0.773471	0.423339			1.62654
0.547093	1.7337		2.54668	0.804907			1.89337			0.0331949	0.763874	0.375464			1.64767
0.476461	1.56058		2.30978	1.0976			1.24503			0.150465	0.670578	0.373097			1.82108
0.498531	1.88976		2.07287	1.24395			0.683989			0.178257	0.690763	0.474589			4.4201
0.469319	2.08924		2.30978	1.26224			3.44589			0.297422	0.674936	0.397125			1.78339
0.645659	0.435995		2.30978	2.1952			0.21884			0.0791198	0.889865	0.0745645			2.45365
0.724057	0.419401		2.25055	2.25008			4.16966			0.146017	0.782245	0.0638914			1.58103
0.503449	0.409857		2.25055	1.9208			0.269953			0.203658	1	0.166693			2.38297
0.600485	0.497351		2.07287	1.59152			0.204331			0.395063	1	0			2.48352
0.598308	0.447268		2.25055	1.42688			0.259752			0.207484	0.933318	0.244142			1.94673
0.369949	0.416965		2.01552	1.20736			0.333245			-0.000940187	0.927212	0.300718			2.4536
0.434361	0.422828		1.27908	1.20736			0.308262			0.135333	0.870272	0.380388			2.4634
0.489842	0.391859		0.85272	1.39029			0.233738			0.268046	1	0.328829			1.90497
0.366257	0.343625		0.93024	0.951253			0.380794			0.391511	0.824848	0.0734668			5.92539
0.385172	0.327929		1.39536	1.1845			0.41591			0.199327	0.837092	0.45277			5.80919
0.539834	0.329045		1.62792	1.24372			0.555635			-0.0700243	0.933961	0.306191			5.51702
0.528994	0.444619		2.44188	1.00683			0.661827			0.140873	1	0.27794			5.65234
0.653631	0.402288		1.56978	1.59908			0.478879			0.0905329	0.930492	0.305094			5.48554
0.646881	0.435032		1.27908	1.50037			0.606337			0.0338446	1	0.262419			5.69046
0.211448	0.49056		2.21778	1.30295			0.579467			0.0141955	1	0.241354			5.76498
0.236864	0.522217		2.38206	0.651475			0.609163			0.0954921	1	0.316653			5.56672
0.315231	0.482025		1.35531	2.21107			0.543789			0.265207	1	0.345941			5.99765
0.447237	0.43288		1.39638	1.06605			0.495241			0.228935	1	0.392575			6.2076
0.43425	0.331363		1.60173	2.18892			0.409013			0.312381	1	0.375267			6.15459
0.552849	0.208318		1.35531	1.73536			3.11785			0.231217	0.53504	0.328002			5.77889
0.542576	0.30334		1.6428	2.20864			2.31827			-0.0390468	0.566847	0.184103			5.56211
0.766294	0.398723		1.04729	2.72136			1.7149			0.253639	0.50608	-0.0706349			5.4758
0.691501	0.401621		1.72494	2.72136			2.12397			0.269389	0.893062	0.425159			0.579987
0.739928	0.420913		0.73926	1.30152			3.15212			0.0907552	0.593741	0.237785			5.77611
0.653197	0.455966		2.03296	1.59732			3.33337			0.214317	0.580511	0.210682			5.70124
0.657314	0.622443		1.72494	1.95228			2.81838			0.243103	0.592854	0.201237			5.72624
0.783205	0.484005		1.35531	1.02433			1.06293			0.18354	0.701571	0.442384			5.35322
0.367722	0.429128		2.15618	1.26536			1.19841			-0.110076	1	0.494594			4.63705
0.342053	0.428496		2.40259	1.56663			1.68554			0.160757	1	0.26623			4.40684
0.538778	0.430004		2.52581	1.28544			1.98903			0.218531	0.838252	0.223888			1.46652
0.704665	0.451265		2.03296	2.08884			3.13561			0.14982	0.582171	0.462204			5.68199
0.736545	0.405997		2.15618	1.39668			2.95801			0.188856	0.515031	0.353239			5.53136
0.452379	0.382363		2.03296	1.39668			2.53562			0.0091233	0.528815	0.220447			5.71358
0.540688	0.330019		2.09457	1.28029			1.31629			0.32897	0.564961	0.149865			5.33355
0.48869	0.734943		2.03296	0.58195			1.4375			0.149592	1	0			4.15925
0.486737	0.396422		2.40259	1.39668			2.25904			0.300691	0.552833	0.45197			5.6732
0.66671	0.477895		2.58741	1.1639			1.9309			0.451297	0.544866	0.485537			5.57727
0.797156	0.573734		2.4642	1.57126			1.10285			0.396424	0.573853	0.468866			5.32375
0.359437	0.877722		1.78655	1.68765			0.893724			0.214027	0.905132	0.345326			5.27126
0.212296	0.667506		2.34099	1.28029			0.601535			0.308886	0.522479	0.315545			0.200827
0.266579	0.249868		2.09457	1.1639			0.485208			0.361142	0.520378	0.0482218			1.07739
0.267496	0.295443		1.97136	1.28029			0.512348			0.287469	0.596425	0.380266			1.12892
0.362486	0.21767		1.90976	1.22209			0.396018			0.150163	0.741257	0.343462			1.72692
0.492046	0.301549		2.03296	1.1639			0.518303			0.265532	0.563506	0.294918			1.16049
0.337661	0.259194		2.21778	1.33848			0.676102			0.120999	0.760162	0.396926			1.14824
0.479915	0.248389		1.60173	0.756535			0.289618			0.360188	0.519011	0.299127			2.13404
0.453684	0.221015		2.21778	1.7474			0.481722			-0.281499	0.822399	0.0497972			1.08782
0.811091	0.249249		2.27938	0.96408			0.571981			0.182298	0.659294	0.115636			1.07155
0.689709	0.31967		2.64901	1.2051			0.224946			0.1589	0.552794	0			2.16385
0.738609	0.434452		1.97136	1.26536			0.51015			0.317537	0.85661	0.247594			1.22001
0.722176	0.384767		1.84815	1.50638			0.312081			0.191793	0.724694	0.228428			1.31879
0.57454	0.430769		2.19725	0.662805			0.397852			0.275643	0.808951	0.293684			1.22877
0.583755	0.342653		2.13786	1.2154			1.35055			0.306342	0.57442	0.308759			0.531879
0.868426	0.257818		2.01909	1.70156			1.86443			0.0360459	0.85067	0.388337			0.169799
0.699921	0.226333		1.95971	2.4308			1.42511			0.235176	0.756859	0.152733			0.183179
0.306485	0.20446		1.72216	2.12695			1.36344			0.211932	0.868852	0.0328245			6.17858
0.410397	0.213633		2.01909	1.86361			1.19219			0.222641	0.665485	0.489302			0.574793
0.473244	0.37171		1.90032	1.45848			0.969424			0.0220641	0.627619	0.494396			0.425053
0.380553	0.459727		1.84093	1.53951			0.232609			0.167708	0.517503	0.21895			5.81713
0.61258	4.28502		2.19725	0.66847			0.544549			0.127973	0.675034	0.279866			4.60917
0.422826	3.48239		2.07848	0.6077			3.68861			0.23357	0.866237	0.0558068			6.03936
0.38674	3.77519		2.25663	1.71495			1.55152			0.0488201	0.708709	0.385601			5.90659
0.286763	1.54419		2.13786	2.62959			0.204509			0.0044582	0.531322	0.379544			5.08104
0.399132	2.64865		1.84093	1.82928			0.462407			0.0826285	0.949974	0.186163			0.0565094
0.52067	4.11799		1.95971	1.29574			0.402262			0.144709	0.906897	0.492082			0.0723238
0.55753	4.26978		1.90032	1.25763			0.200266			0.142624	0.590867	-0.194583			5.61429
0.532788	2.49693		1.42524	2.01267			0.293921			0.271352	0.754322	0.32475			5.19442
0.444899	4.62514		1.42524	1.89069			0.254215			0.100465	0.674251	0.408945			4.88248
0.467595	4.74758		1.66278	0.91485			0.27715			0.0572043	0.546742	-0.0784107			4.25177
0.520491	2.99009		2.01909	1.38244			0.298349			0.165036	0.765004	-0.297778			3.96412
0.519036	2.71135		2.19725	1.70772			0.343959			0.268017	0.801742	-0.290151			3.98756
0.468626	4.25028		1.60339	0.85386			0.291983			0.358513	0.902893	0			4.07713
0.447068	4.89693		1.78155	1.89069			0.323901			0.0685956	0.946236	0.412281			4.48774
0.428439	5.38673		1.72216	2.01267			0.272188			0.186859	1	0			4.15269
0.369185	0.717188		2.0706	1.89069			0.434391			0.0813764	1	0			4.66505
0.790174	0.746072		1.41984	1.30112			0.331302			0.396352	1	0.256333			4.11285
0.458275	0.642222		1.26208	1.52475			0.472234			0.370759	1	0.443004			4.47494
0.368829	0.889233		1.24236	1.95168			0.270534			0.159693	1	0			4.2103
0.433344	0.805296		1.1832	1.87036			0.361412			-0.0771933	0.860231	0			4.65779
0.387536	0.768576		1.24236	1.2198			0.417618			0.22224	0.711621	0.12034			4.59355
1.0777	0.914412		1.71564	1.28079			0.359662			0.383627	0.72068	0.362968			4.53033
0.443493	0.97985		1.83396	1.40277			1.83648			0.383891	0.587796	0.291867			5.26943
0.33261	0.885542		2.01144	1.28079			0.330762			0	0.589782	-0.0124857			0.226966
0.404642	0.875353		1.60339	1.58574			0.322411			-0.0808493	0.57888	0.105166			0.223216
0.487002	0.962619		1.95971	0.97584			0.321408			0.324898	1	0.35081			0.195009
0.775549	0.915328		2.25663	1.95168			0.417509			0.332248	0.726428	0.0575204			0.842161
0.388112	0.975112		1.54401	2.07366			0.323426			0.275354	0.741071	0.12177			0.592975
0.415944	0.93613		1.60339	1.76871			0.348941			0.230568	1	0.0390516			0.331357
0.419195	0.983238		1.5836	1.58574			0.324742			-0.230262	0.970972	-0.00505765			0.600228
0.431831	0.985307		1.82114	1.54508			0.282208			0.163663	1	0.284757			0.947477
0.465012	2.23397		1.60339	1.70772			0.234688			0.486827	0.562854	0.258306			0.544049
0.382347	1.51296		2.01267	1.8297			0.223872			0.219263	1	0.169185			0.345211
0.290364	1.57215		2.13465	1.05716			0.366163			0.323766	0.538141	0.305484			1.07015
0.271188	1.79184		2.01267	1.78904			0.345875			0.0419816	1	0.32209			0.80204
0.324901	1.86857		1.95168	1.30112			0.387707			0.266154	1	0.273499			0.911539
0.475715	1.63433		2.4396	1.64673			0.267352			0.178365	0.54808	0.169771			0.412381
0.418235	1.29613		2.31762	1.34178			0.296355			0.222084	0.512918	0.304382			0.650791
0.341493	1.25963		1.8297	1.70772			0.225298			0.16936	0.63761	-0.0858216			0.650555
0.519002	1.5455		1.95168	2.31762			0.361523			0.217719	0.773247	0.179853			3.66646
0.555949	1.89306		2.01267	0.79287			0.313128			0.415588	0.58668	0.327592			2.30983
0.379566	1.89337		1.89069	1.64673			0.246295			0.313059	0.560781	0.0336747			2.42279
0.600203	1.24503		2.56158	1.95168			0.378622			0.479158	0.602268	0.182283			4.68227
0.575539	1.19333		1.76871	1.95168			0.250695			0.0510974	0.638512	-0.0807733			5.1214
0.590575	0.683989		2.31762	1.70772			0.615076			0.481802	0.578349	0			3.1884
0.700015	0.775041		2.37861	1.58574			0.443874			0.00902587	0.620992	0.348004			0.675489
0.635627	2.50689		2.62257	1.95168			0.472244			0.0287758	0.769884	0.285151			1.2109
0.682439	3.63035		2.50059	1.58574			0.260917			0.135495	0.523554	0			0.528972
0.678807	3.44589		1.70772	1.09782			0.840797			0.147872	0.934028	0			5.19334
1.14947	3.88278		2.56158	1.34178			0.422931			0.181932	0.704593	0			5.39329
0.958901	3.33823		2.56158	1.38244			1.07025			0.136	0.681828	0.309576			3.81779
0.780668	0.495902		2.19564	0.8132			1.41881			0.0881833	0.567177	0.279543			4.63018
0.844007	0.606954		2.50059	1.6264			1.54937			-0.035615	0.696304	0.289689			4.77492
0.729296	2.93965		2.01267	2.07366			1.23025			0.42109	0.510438	0.241717			4.85177
0.662708	2.29953		2.62257	1.2198			1.78572			0.248821	0.639306	0.125209			4.91722
0.726888	0.436456		2.25663	1.46376			1.55065			-0.202544	0.576572	0.24678			4.79742
0.52912	0.338378		1.76871	1.34178			1.74662			0.070067	0.763955	0.226866			4.93553
0.448531	0.28584		2.13465	0.67089			1.24657			0.150074	0.716082	0.235619			3.85093
0.480811	2.9547		1.95168	1.34178			1.56791			0.281205	0.59872	0.255084			4.22107
0.804747	2.77476		2.50059	1.34178			1.37866			0.30122	0.547339	0.195529			4.84726
0.514927	0.21884		2.50059	1.58574			1.37878			0.388609	0.614502	0.204451			4.54929
0.402302	4.16966		2.07366	1.8297			1.15912			0.252415	0.531145	0.169429			4.7937
0.431281	4.46007		2.19564	2.07366			5.17888			0.164933	0.754096	0.344736			4.78815
0.479526	4.6947		1.8297	1.95168			5.93115			0.163135	0.762117	0.182821			4.93212
0.409146	0.269953		2.07366	1.95168			4.75687			0.101842	0.664737	0.351608			3.51185
0.401692	2.84379		2.31762	2.25435			4.35231			0.329812	0.61362	0.18663			4.98995
0.342117	0.204331		2.56158	2.30803			0.438263			0.0110269	1	0.219424			5.13882
0.386807	0.259752		1.8297	2.3617			0.238593			0.27257	1	0.101086			4.90401
0.31738	0.333245		2.31762	2.25435			0.793012			0.326821	0.668002	0.333644			5.03221
0.320359	0.308262		2.13465	2.03965			0.406703			0.0333882	0.787764	0.246873			5.2357
0.454014	0.244625		2.01267	2.46905			0.945215			0.110141	0.630107	0.344256			5.12871
0.275927	0.233738		1.95168	2.147			0.534624			0.41757	1	0.263347			5.05449
0.205718	0.380794		2.31762	2.147			0.47294			0.0317523	1	0.47787			5.07088
0.20477	0.41591		2.13465	2.09333			0.270337			0.334288	1	0.347327			5.12192
0.322659	0.555635		1.89069	2.30803			1.11104			0.136261	0.690819	0.163657			3.93314
0.284532	0.661827		2.13465	1.98598			1.20784			0.116429	0.739665	0.19591			3.86938
0.28575	0.478879		1.58574	2.52272			0.910203			0.16986	0.758923	0.221723			4.08771
0.330708	0.606337		2.31762	1.98598			0.664611			0.0849163	0.782165	0.315758			4.76457
0.61937	0.579467		2.4396	1.77127			0.784344			0.161991	0.632813	-0.0258493			4.78196
0.668096	0.609163		2.25663	2.147			0.728254			0.250804	0.851081	0.0732349			4.90828
0.522026	0.543789		2.4396	2.41538			0.226175			0.336677	0.59549	0.0694929			2.16243
0.325845	0.495241		2.13465	2.25435			4.36331			0.107587	0.547352	0.148814			1.72283
1.04091	0.429072		2.37861	2.41538			5.65244			0.123304	0.559604	0.348518			1.95439
1.04824	0.409013		2.19564	2.30803			2.60161			0.301629	0.512955	0.235634			2.36149
1.055	3.11785		2.19564	2.20067			1.96324			0.265999	0.535277	0.335269			2.37797
1.0182	2.31827		2.01267	1.2474			2.94326			0.282244	0.511656	0.451455			2.19968
1.29521	1.7149		2.25663	0.7128			1.68781			0.0958	0.526282	0.434908			4.81926
1.17816	1.11657		2.56158	1.3068			4.06697			0.339978	0.527974	0.46293			4.65246
1.69664	1.26827		2.07366	1.7226			4.69431			0.358918	0.611566	0.437833			4.60905
1.82833	1.45043		2.4396	1.7226			3.57275			0.0754187	0.566211	0.440243			0.550345
1.28336	1.64946		2.25663	2.4948			2.25301			0.281405	0.690693	0.145979			0.877384
0.969328	2.12397		1.64673	2.1384			3.78051			0.206558	0.637382	0.409992			0.702639
0.712124	3.15212		2.07366	1.3068			4.19844			0.0895971	0.588058	0.234108			0.719194
0.685144	3.33337		1.70772	1.3068			4.54156			0.0825463	0.644142	0.284549			0.823549
0.955848	2.81838		2.37861	1.3068			3.72372			0.391069	0.649845	0.246884			0.641547
1.24337	1.89541		2.4396	1.782			1.87235			-0.0335468	0.743979	0.177791			0.527923
1.01645	1.54672		2.19564	1.3068			2.92668			-0.0367257	0.704257	0.3856			0.632161
1.03592	1.06293		2.07366	1.8414			2.73301			-0.0306671	0.64619	0.310882			0.61601
0.886278	0.85787		2.07366	1.9008			3.27			0.123874	0.617506	0.291973			0.609503
0.839794	1.07698		2.37861	1.9602			2.16595			0.0221359	0.637786	0.0766519			0.703632
0.836167	1.19841		2.07366	1.1286			1.71088			0.0864995	0.732315	0.160376			0.7911
0.688251	1.68554		2.37861	2.2572			2.07737			0.440103	0.657485	0.225305			0.639676
1.62592	1.98903		2.56158	1.6264			1.75418			0.0355704	0.579507	0.0780691			0.833236
1.95691	3.13561		2.07366	1.95168			3.29175			0.313646	0.711098	0.257421			4.69785
2.71069	2.95801		2.07366	2.033			2.87612			0.347055	0.74033	0.157733			3.85346
2.87821	2.53562		2.07366	2.27696			3.12734			0.0915713	0.52481	0.320123			5.2764
2.22977	1.97316		2.25663	2.27696			1.31385			0.0648214	0.530235	0.25541			5.1684
2.0774	1.31629		1.8297	1.87036			1.23113			0.391867	0.867613	0.051944			1.42259
2.3509	1.0619		2.07366	2.19564			1.11453			0.162377	0.75108	0.131279			1.15642
2.07823	1.1661		1.95168	2.11432			1.24744			0.0916333	0.973976	0.221295			1.32072
2.25499	0.964089		1.70772	2.11432			1.32472			0.149395	0.948504	0.0110969			1.21649
2.12529	1.4375		1.64673	2.11432			1.15018			0.361738	0.854382	0.155014			1.4602
2.56162	1.97036		1.70772	1.95168			1.42048			0.450673	0.998818	0.345827			1.3361
3.28477	1.73833		2.19564	1.70772			1.19906			0.49068	0.961334	0.300804			1.37418
3.13561	2.25904		2.07366	1.95168			1.17034			-0.0610852	0.529279	0.0939043			1.46849
2.12724	2.63218		1.95168	1.6264			1.14343			-0.151737	0.568628	0.0565806			1.24406
0.521836	1.9309		2.56158	1.70772			1.14396			0.225002	0.530904	0.0562474			1.41174
0.688388	1.64999		2.19564	1.78904			1.24627			0.0339927	0.79287	0.267813			1.15061
0.726762	1.10285		2.50059	1.70772			1.22288			0.398494	0.657985	0.106361			1.25883
0.729273	1.05467		2.37861	1.95168			1.27665			0.4821	0.715645	0.324428			1.20239
0.770658	0.893724		2.13465	2.033			2.47675			0.085349	0.552712	0.369985			2.56449
0.479066	0.601535		2.13465	0.9823			2.83213			0.437809	0.533458	0.35827			2.90181
0.436684	1.23585		2.07366	2.0988			2.80745			0.165506	0.543123	0.214735			2.9559
0.683615	0.485208		2.13465	2.0988			3.09804			0.180913	0.503495	0.0894865			6.01207
0.489482	0.533798		2.13465	2.2154			3.8873			0.46591	0.563024	0.140494			5.87958
0.596648	0.258051		1.59044	1.9822			4.87379			0.0593861	1	0.331265			5.62228
0.388662	0.512348		2.12058	2.0988			4.09689			0.244953	0.964658	0.101924			5.71638
0.708348	0.42467		1.88496	2.2154			3.68482			0.195254	0.546871	0.154711			5.8433
0.39281	0.396018		1.59044	2.4486			4.85413			-0.0626489	0.846185	0.46437			5.61844
0.389152	0.391934		1.88496	2.4486			4.13147			0.0481345	1	0.0623029			5.60716
0.376297	0.696008		2.06168	2.0405			3.25798			-0.0405131	1	0.168008			5.53242
0.552899	0.261605		2.53292	2.0988			2.8658			0.0907502	0.640271	0.260732			5.65892
0.747931	0.550138		1.82605	2.2737			3.99202			0.049008	0.867622	0.36539			5.73139
0.615022	0.518303		1.82605	2.3903			3.11581			0.143607	1	0.180196			5.44646
0.474758	0.411252		1.02102	2.2737			3.03886			0.107084	1	0.192945			5.54822
0.479094	0.215492		1.41372	1.9239			2.61617			0.251781	0.922869	0.218394			5.35722
0.59192	0.676102		1.70824	1.9822			2.62412			0.356801	0.851077	0.0839921			5.57751
0.607863	0.512407		2.17948	1.9239			2.18435			0.20823	0.738233	0.252025			5.6658
0.764898	0.289618		1.82605	2.2737			3.71023			0.0217349	0.641338	0.153859			5.97304
0.788649	0.304334		2.06168	2.0988			3.05718			-0.0622999	0.639331	0.309009			5.57129
0.543789	0.375308		2.41511	2.0405			4.07389			0.241188	0.816932	0.146323			5.73297
0.453934	0.35103		2.06168	2.5069			1.9288			0	0.884242	0.103609			5.62022
0.441994	0.256899		2.3562	2.2154			1.99657			0	0.832315	0.0347581			5.52348
0.393979	0.271863		1.80642	2.4486			2.18813			0	0.808179	0.444784			5.4781
0.402405	0.481722		1.237	2.332			2.5028			0	0.782424	0.239826			5.50095
0.59006	0.393215		2.3562	2.1571			1.88406			0	0.689675	0.380726			5.5566
0.647712	0.24457		2.00277	2.3903			2.159			0	0.915709	0.476123			5.63494
0.724789	0.571981		1.76715	2.1571			2.20797			0	0.779091	0.442647			5.6283
0.644602	0.301593		2.3562	1.9239			2.11689			0	0.76144	0.401465			5.57955
0.4791	0.224946		2.06168	2.332			2.03995			0	0.724474	0.304373			5.40581
0.477837	0.541255		1.88496	2.0988			1.87701			0	0.964237	0.166745			5.55803
0.437441	0.51015		1.88496	1.9822			1.66866			0	0.850591	0.302178			5.56848
0.542928	0.31539		1.94386	1.72144			3.04147			0.346091	0.915925	0.0973638			5.68983
0.363915	0.312081		1.94386	1.24656			2.02969			-0.0782769	0.759593	0.175637			5.70313
0.376903	0.24565		2.41511	1.36528			1.59662			0.383077	0.661367	0.27115			5.73711
0.366051	0.397852		2.47401	1.1872			1.16504			0.235405	0.69459	0.303262			5.69598
0.331638	1.35055		1.2051	1.69167			2.17626			0.0575148	0.55981	0.277998			3.64825
0.402055	0.635409		1.56663	0.98226			4.18646			0.342596	1	-0.0558799			0.778581
0.405707	0.719552		2.28969	1.41882			2.41765			0.266494	0.51944	-0.102321			3.6087
0.40953	0.848666		1.92816	1.67348			2.23041			0.186387	0.54635	0.270573			3.5403
0.21905	0.762205		1.38586	1.52796			5.03993			0.223466	1	0.315604			0.945623
0.22416	1.86443		1.38586	1.23692			4.67402			0.239316	1	0.219204			0.895161
0.230422	1.42511		0.72306	1.30968			2.48937			0.234501	0.566112	0.404757			3.61736
0.239155	1.36344		2.04867	1.90995			2.52672			0.089634	0.639242	0.16684			3.54108
0.212994	1.19219		1.08459	1.6371			4.25762			-0.0441154	1	0.215554			0.994963
0.271671	0.969424		1.08459	1.47339			4.03949			-0.064154	1	0.109807			0.885305
0.254815	0.228481		1.56663	1.41882			2.13144			0.309504	0.525588	0.278509			3.55994
0.2251	0.252464		2.05794	1.41882			2.20226			-0.039726	0.644449	0.25268			3.57319
0.225638	0.260021		2.2866	2.03728			4.10939			-0.0615905	1	0.319611			0.841057
0.218998	0.251154		2.57242	1.89176			2.16214			0.155871	0.592447	0.403846			3.56956
0.215765	0.268937		2.17227	1.43808			2.37981			0.0716278	0.664964	0.355073			3.62531
0.542613	0.346736		2.40093	1.7976			5.86881			0.178099	1	0.449801			0.805883
0.459594	0.232609		1.84576	2.33688			2.68967			0.215662	0.592763	0.135058			3.58777
0.589551	0.416422		1.442	1.97736			2.70768			0.411529	0.555387	0.0670301			3.55872
0.524544	0.204901		1.67272	1.91744						0.445688		0.0559464
0.553051	0.300851		1.32664	1.7976						0.268478		0.356725
0.618942	0.544549		1.1536	1.91744						0.358718		0.277434
0.586369	0.207759		1.442	1.97736						0.411185		0
0.51193	0.225624		1.442	2.33688						0.46956		0.130515
0.482133	3.68861		1.55736	2.51664						0.322229		0.192804
0.468731	1.55152		1.442	1.97736						0.422479		0.398105
0.475702	0.211533		1.55736	1.67776						0.346164		0.251296
0.429358	0.204509		1.55736	1.91744						0.339663		0.286813
0.347707	0.209339		1.21128	1.7976						0.27498		0.0855461
0.356082	0.207081		0.8652	2.21704						0.25834		0.161255
0.288608	0.247507		2.13416	2.3968						0.192714		0.249628
0.274653	0.256174		2.13416	1.91744						0.165208		0.316536
0.374792	0.266705		1.49968	1.91744						0.395795		0
0.305607	0.216376		1.09592	1.73768						0.320697		0.370722
0.257682	0.462407		1.84576	1.97736						0.242153		0.235666
0.268126	0.402262		1.38432	2.27696						0.36957		0.372607
0.293513	0.257962		1.96112	1.91744						0.212258		0.27581
0.289377	0.24595		2.07648	2.21704						0.10428		-0.0696184
0.347656	0.200266		1.78808	2.33688						0.109458		0.225553
0.310895	0.293921		1.32664	1.97736						-0.0110262		0.257741
0.421744	0.254215		1.96112	2.03728						-0.0351681		0.328802
0.504597	0.307341		2.13416	2.03728						0.166401		0.390295
0.531975	0.393051		1.67272	1.97736						0.169536		0.376958
0.396587	0.412093		1.90344	1.7976						0.119496		0.135235
0.364208	0.419016		1.84576	1.97736						0.305162		0.0163642
0.838217	0.3746		1.442	2.33688						0.118722		0.311499
0.902819	0.606925		2.07648	2.42822						0.172411		0.357332
0.920238	0.510991		1.69195	1.48063						0.159803		0.0513271
0.855586	0.537405		1.90344	1.71752						0.143452		-0.0641983
0.813967	0.58341		1.7304	2.1321						0.126613		0.243483
0.7922	0.532397		1.90344	1.71752						-0.0315033		0.307799
0.71509	0.341931		1.61504	2.01365						-0.0657881		0.393503
0.635694	0.583459		0.92288	1.77675						0.173425		-0.0696005
0.913229	0.455829		1.26896	2.30978						0.360219		0.27303
0.454851	0.41685		1.32664	2.01365						0.175712		0.464803
0.556513	0.383758		1.55736	1.83597						0.0956848		-0.0348551
0.548448	0.274125		0.98056	1.95443						0.12114		0.181258
1.37934	0.27715		1.61504	2.369						0.164374		0.389197
1.83799	0.226781		1.09592	2.1321						0.428516		0.0973943
1.45117	0.298349		1.23051	1.8952						0.394057		0.186276
2.09475	0.343959		1.55736	1.95443						0.179284		0.435235
1.4808	0.275343		2.4948	1.77675						0.353069		0.313763
2.23582	0.291983		1.9008	1.71753						0.28679		0.342792
1.43239	0.323901		2.5542	1.83597						0.154147		0.250781
2.58216	0.327892		1.5444	2.01365						0.317379		0.0639354
1.53774	0.272188		2.1384	2.48745						0.157032		0.0506304
2.30001	0.434391		2.2572	2.25055						0.203781		0.41117
2.04246	0.409849		2.346	2.1321						0.320931		0.29855
1.88398	0.331302		2.28735	1.6583						0.121009		0.210973
2.15602	0.472234		2.40465	2.19132						0.0912541		0.221975
1.98677	0.256603		1.70085	2.19133						0.0878525		0.3623
2.55496	0.259977		0.76245	2.07287						0.109386		0.482529
2.17658	0.398799		1.81815	2.25055						0.0512584		0.0304931
1.78325	0.270534		1.58355	1.8952						0.216998		0.399245
2.32718	0.361412		1.58355	2.48745						0.24765		0.220119
1.85788	0.417618		0.87975	2.07287						0.259052		0.214852
1.88595	0.244415		0.9384	2.25055						0.101165		0.425487
0.942997	0.407384		0.99705	2.42822						0.142409		0.0721613
2.44478	0.359662		0.9384	1.24372						0.142804		-0.0346189
3.02529	2.98707		0.52785	1.95443						0.231492		0.309049
2.97866	2.88491		0.64515	2.1321						0.0767489		0.30144
2.69806	3.43874		1.0557	1.6583						0.12569		0.0702756
2.57025	3.08755		1.173	1.95443						0.251865		0.208236
1.31566	3.08712		2.1114	2.1321						0.262687		0.228832
2.20289	2.75845		1.4076	2.25055						0.192977		0.304726
1.07275	3.81869		0.9384	2.19132						0.24709		0.366363
2.45128	3.41833		1.564	1.95443						0.313943		0.116844
2.56692	2.4039		1.23165	1.53985						0.208356		0.230221
3.21659	3.86179		0.64515	1.30295						0.40279		0.201395
2.7986	1.83648		1.23165	1.95443						0.226542		0.180057
3.01866	3.37778		2.4633	1.8952						0.441429		0.260617
3.24889	1.96681		2.2287	2.30978						0.109782		-0.0185685
0.705021	3.20683		0.29325	2.72435						0.0618971		0.0793915
1.90884	3.22395		0.8602	2.42823						-0.114579		0.107879
1.38195	2.6546		2.40465	2.30978						0.07638		0.341303
0.384063	0.325079		2.52195	2.66513						0.448143		0.212783
1.24212	0.330762		2.2678	2.6059						0.133856		0.0952863
1.26478	0.397501		1.6422	1.6583						0.314351		0.321583
0.948316	0.322411		1.0557	1.71752						0.0287984		0.119071
1.95607	0.321408		2.52195	2.369						-0.145954		0.415926
3.13779	0.417509		2.1114	2.30978						-0.0540834		0.364585
3.27098	0.323426		1.173	2.30978						0.102925		0.304127
0.471901	0.348941		0.8211	2.6059						0.288881		0.479377
0.339537	0.324742		0.9384	2.42822						0.19739		0.374901
0.244057	0.262823		1.2903	2.54668						0.411805		0.265226
0.213658	0.372205		2.5806	2.54668						0.141304		0.114922
0.290401	0.385638		2.17005	2.369						-0.00360027		0.0619728
0.374897	0.321956		2.40465	1.95443						0.107727		0.185424
0.44535	0.282208		1.34895	2.19132						0.112133		-0.155426
0.416165	0.301264		0.8211	2.52693						0.282698		0.363263
0.448823	0.234688		2.346	2.07287						0.344617		0.457598
0.630016	0.264437		2.28735	2.25055						0.340821		0.312143
0.548373	0.420218		2.52195	2.01365						0.446156		0.314777
0.59377	0.3331		1.93545	2.25055						0.310067		0.0858512
0.770769	0.223872		1.4076	2.48745						0.213252		0.294246
2.02094	0.366163		1.23165	2.6487						0.354036		0.219643
0.281901	0.503574		1.58355	2.53098						0.125773		0.180748
0.272997	0.345875		1.23165	2.58984						0		0.152101
0.291508	0.387707		1.70085	2.3544						0.0301817		0.261326
0.241444	0.326257		1.5249	2.04048						0.14379		0.258332
0.259095	0.379545		1.86837	2.58984						0.201896		0.278522
0.391924	0.39738		1.8081	2.27592						0.467142		0.236361
0.425861	0.428024		1.8081	2.3544						0.491607		0.266755
0.332304	0.325262		1.56702	1.64808						0.117994		0.148535
0.414036	0.314925		1.68756							0.0889626		0.265389
0.37557	0.309301		1.92864							0.261212		0.0676016
0.411333	0.310938		1.50675							0.33545		0.255844
0.370104	0.267352		1.56702							0.499567		0.289343
0.269196	0.349942		1.38621							0.202668		0.311637
0.309647	0.278996		1.2054							0.192838		-0.0387069
0.382662	0.296355		1.92864							0.165986		0.322411
0.522602	0.427215		1.68756							0.216279		0.352682
0.411273	0.407426		1.74783							0.267467		0.246315
0.699827	0.292097		2.35053							0.224364		0.224098
0.210931	0.25755		1.86837							0.326579		0.25902
0.273835	0.454417		1.86837							0.229991		0.243947
0.2364	0.225298		1.98891							0.27723		0.291286
0.21653	0.555545		0.90405							0.273138		0.28311
0.2099	0.664459		1.44648							0.124342		0.206127
0.293217	0.666759		1.86837							0.120293		0.271831
0.206241	0.518412		1.44648							-0.178245		0.184516
0.26634	0.464918		1.2054							0.165208		0.134217
0.26125	0.812		1.50675							0.162216		0.172279
0.202187	0.609167		1.44648							0.0789799		0.198609
0.208082	0.403954		1.197							0.386289		-0.00245854
0.364319	0.466953		1.0374							0.296886		-0.217662
0.266746	0.741681		1.13715							0.217908		0.0380038
0.21964	0.361523		1.4364							0.164845		0.298975
0.22253	0.528005		1.13715							0.301182		0.26329
0.369711	0.547394		1.3167							0.287861		0.0936419
0.338323	0.333217		1.3566							0.261888		0.088484
0.224476	0.75635		1.197							0.425979		0.140424
0.499392	0.62583		1.13715							0.189511		0.0455568
0.302531	0.39419		1.4364							0.452854		0.142571
0.350444	0.36753		1.0773							0.256695		0.23
0.219581	0.342397		1.37655							0.23871		0.158932
0.233365	0.275094		1.4364							0.24241		0.0146921
0.350002	0.316397		1.01745							0.286174		0.249012
0.250309	0.435756		1.1172							0.233626		0.109032
0.332753	0.283863		2.0748							0.367082		0.155397
0.215957	0.308855		1.1172							0.317127		-0.54521
0.203138	0.308875		1.73565							0.263108		-0.393542
0.279688	0.313128		1.73565							0.340584		0.043347
0.290925	0.245276		1.596							-0.0511284		-0.42679
0.213261	0.373187		1.3167							0.184783		0.20037
0.27867	0.40158		1.7955							0.0924933		0.202302
0.267769	0.388951		0.7182							-0.0449476		0.221265
0.25183	0.321012		0.65835							0.0264915		0.208722
0.31847	0.451399		0.6384							0.0331137		0.142138
0.297214	0.424383		1.0374							0.0560861		0.175
0.2436	0.32476		2.09475							0.342508		0.215764
0.218611	0.376184		1.73565							-0.110729		0.180221
0.283471	0.668138		1.4364							-0.0318418		0.338967
0.2436	0.367436		1.0374							0.249019		0.318416
0.270853	0.460824		0.5985							0.336209		0.210546
0.402205	0.792322		0.4788							0.385852		0.141114
0.236462	0.371594		1.3566							0.397086		0.0670786
0.211685	0.573234		1.73565							0.00695716		0.054072
0.240637	0.690639		1.504							0.156118		0.369277
0.209712	0.358657		1.86496							0.270953		0.380886
0.248755	0.472884		1.68448							0.280507		0.106573
0.24952	0.673676		1.2032							0.214424		0.11647
0.382922	0.493825		1.36363							0.371319		0.24453
0.324093	1.12933		2.22592							0.320489		0.204788
0.218012	0.317883		1.62432							0.327811		-0.086218
0.223474	0.460536		1.74464							0.100943		0.209247
0.219791	1.16938		1.86496							0.388237		-0.156276
0.235219	0.335771		1.62432							0.285774		0.253766
0.238306	0.239057		1.44384							0.30525		0.339298
0.269713	0.26652		1.98528							0.342294		0.346444
0.220558	0.300957		1.68448							0.251365		0.255635
0.212066	0.205721		1.44384							0.109754		-0.177465
0.236539	0.203497		1.12299							-0.0510832		0.0440357
0.203138	0.246295		1.504							0.235995		0.00577547
0.265168	0.376899		1.52405							0.496819		-0.0449516
2.52211	0.38026		1.2032							0.343992		0.216903
2.4713	0.314164		1.08288							-0.209891		-0.0747847
2.32619	0.812524		2.21328							0.339964		0.234363
2.4312	0.36839		2.33624							0.147904		-0.0752848
1.42146	0.361097		2.1518							0.136151		0.173508
2.22261	0.378078		1.41404							0.0529706		0.119042
1.46175	0.447276		1.16812							0.285604		0.169256
1.28617	0.369872		1.10664							0.16923		-0.0483425
1.06947	0.347516		1.8444							0.115896		-0.0195634
1.26441	0.357027		2.09032							0.0879747		0.371903
1.66306	0.623437		1.41404							0.0732848		-0.0219876
1.65543	0.438073		1.10664							0.21633		0.327779
0.778804	0.421965		1.537							0.196872		0.272728
0.216716	0.419007		1.47552							0.34634		0.179217
1.1773	0.239345		1.41404							0.249607		0.348948
1.91482	0.268076		1.47552							0.479014		0.225269
1.76898	0.399164		1.8444							0.484413		0.440564
0.429272	0.433451		1.90588							0.124979		0.466134
0.922548	0.324925		1.2296							0.200622		0.460467
0.618402	0.380776		1.35256							0.091077		0.420457
0.710256	0.378622		2.39772							0.181016		0.383347
1.15085	0.306309		1.47552							0.211417		0.482579
1.30761	0.250695		1.65996							0.163634		0.120415
0.995664	0.30997		2.09032							0.395705		0.255965
0.746061	0.440663		1.35256							0.252659		0.0849785
0.521643	0.553615		1.72144							-0.0118261		0.254108
0.48354	0.472445		1.72144							0.0507501		0.246172
0.504148	0.349384		2.1518							0.32175		0.274053
0.655187	0.315024		2.39772							0.229691		0.496983
0.645607	0.268886		1.47552							-0.0309938		0.490519
1.08508	0.285072		1.96736							0.0740587		0.464439
0.645953	0.326322		1.29108							0.277445		0.48592
0.436802	0.340114		0.98368							0.316899		0.459619
0.624995	0.205227		2.2385							0.123272		0.244002
0.492481	0.550726		2.057							0.250931		0.10245
0.408814	0.386078		1.936							0.187432		-0.0391553
0.70263	0.324547		2.057							0.393379		-0.0707323
0.505185	0.288134		1.9965							0.327055		-0.0160808
0.547533	0.254383		1.7545							0.349872		-0.0626345
0.602437	0.288809		1.8755							0.120934		-0.0314356
0.435494	0.310993		1.936							0.300169		0.334683
0.311401	0.253034		1.7545							0.336287		-0.0333115
0.309137	0.276163		1.694							0.25978		0.186385
0.493044	0.203995		1.694							0.221439		0.334206
0.793573	0.615076		2.178							0.440357		0.320715
0.606017	0.454535		2.4805							0.0677711		0.455539
0.557813	0.397458		2.299							0.44325		0.472018
0.616782	0.364607		1.573							0.257385		0.374293
0.70176	0.272014		1.36528							0.143954		0.458591
0.456824	0.286855		0.8904							0.326927		0.282969
0.310035	0.310191		0.8904							0.341151		0.0355325
0.381425	0.275371		1.484							0.113123		0.0780535
0.899405	0.322658		2.01824							0.37229		0.124571
0.906391	0.468319		2.25568							0.189943		0.0393221
0.338795	0.570388		1.484							0.361545		0.0567627
0.776348	0.431887		1.89952							0.469622		0.139974
0.790198	0.443874		2.43376							-0.0971206		-0.0245681
0.564924	0.472244		1.95888							0.15606		0.126913
0.256329	0.392516		2.31504							0.0765083		0.0116678
0.319992	0.532227		2.13696							0.065033		0.0636305
0.366253	0.346706		1.24656							0.349909		0.205218
0.304525	0.346511		2.25568							0.232621		0.0818556
0.387882	0.478185		2.48976							0.0933908		-0.00430518
0.583948	0.356071		2.48976							0.0741879		0.156242
0.490106	0.260917		2.54904							0.323576		0.214346
0.38014	0.297287		2.60832							0.187029		0.183472
0.320509	0.325877		2.60832							0.248504		0.135626
0.351149	0.248281		2.32367							0.0925893		0.00501659
0.358776	0.31098		1.76279							0.231203		-0.0454075
0.404003	0.335958		2.64418							0.4148		0.0279749
0.338817	0.474649		1.84291							0.111303		0.231235
0.406029	0.343731		2.16342							-0.000797757		0.259919
0.401053	0.267114		2.76437							0.335704		0.189814
0.254516	0.466842		1.92304							0.0662954		0.173738
0.243226	0.443361		2.00317							0.335565		0.240619
0.441457	0.39248		1.52241							0.347657		0.480599
0.309785	0.398335		2.08329							0.142247		0.189854
0.200377	0.370709		1.52241							0.0865867		0.339473
0.20014	0.333255		2.16342							0.13315		0.147062
0.747514	0.367368		2.48393							0.244763		0.228343
0.668621	0.369854		1.28203							0.23724		-0.0878399
0.550712	0.359927		2.4038							0.286023		-0.135431
0.574785	0.310707		2.24355							0.0277212		0.237206
0.562365	0.325742		1.68266							-0.0189437		0.282923
0.458287	0.61396		2.16342							0.261745		0.173563
0.500986	0.688252		2.16342							0.155581		0.118292
0.80378	0.393156		2.00317							0.324023		0.0781793
0.740648	0.603686		2.08329							0.166473		0.174128
0.282305	0.663931		2.16342							0.289814		0.115307
0.755949	0.840797		1.92304							0.161777		0.207611
0.49796	0.779737		2.32367							0.0813864		0.303845
0.325398	0.833747		2.48393							0.128172		0.367904
0.581072	0.59545		2.22351							0.220266		0.409602
0.300004	0.557349		2.88456							0.301692		0.345311
0.538067	0.634251		1.782							0.414319		0
0.735504	0.551516		1.8414							0.353948		0.252301
0.586553	0.511192		2.0196							0.262597		0.195036
0.526228	0.465409		2.079							0.253304		0.210998
0.321536	0.470965		1.6632							0.325665		0.152318
0.781747	0.494904		2.1978							0.261006		0.234111
0.683818	0.600528		1.7226							0.0278483		0.209009
0.300624	0.422931		2.079							0.219552		0.197139
0.39098	0.484952		1.1834							-0.00118251		0.218954
0.419504	0.547797		1.1834							0.12322		0.0357419
0.432966	0.576512		1.24257							0.230011		0.154017
0.317025	0.52776		2.07095							0.427002		0.141732
0.289857	0.585577		1.65676							0.0586434		0.363463
0.213432	0.445343		1.06506							0.390255		0.117458
0.377112	0.500726		1.89344							0.138044		0.160621
0.220283	0.492255		1.89344							0.284526		0.103893
0.225858	0.592918		1.95261							0.267026		0.200298
0.463856	0.556184		1.59759							0.244632		0.219968
0.204002	0.522059		2.18929							0.204422		0.174804
0.204195	0.724301		2.13012							0.210044		0.19813
0.327366	0.715713		1.30174							-0.0166823		0.172064
0.210793	0.361527		1.1834							0.194539		0.256075
0.214841	0.362585		1.59759							0.40981		0.294031
0.241483	0.303303		1.95261							0.152811		0.235898
0.220726	0.334766		1.7751							0.332013		0.0997204
0.209154	0.402964		1.45848							0.132134		0.0928635
0.207709	0.279965		1.70156							0.1978		0.182634
0.253496	0.361502		0.85078							0.338259		0.165464
0.201638	0.326706		1.27617							0.47005		0.141585
0.212902	0.247092		1.15463							0.263622		0.0352709
0.254043	0.260292		1.15463							0.113944		0.33184
0.216509	1.07025		1.51925							-0.09939		0.466696
0.204492	1.25893		1.94464							0.0799257		0.394244
0.204737	1.41881		1.45848							0.404339		0.361231
0.209555	1.54937		1.03309							0.482118		0.163883
0.85757	1.10367		0.79001							0.492212		0.207249
0.822671	1.50682		1.64079							0.399945		0.17936
1.02061	1.23025		1.09386							0.204583		0.35023
1.10439	1.78572		1.27617							0.0779926		0.353366
0.876902	1.55065		1.39771							0.167703		0.381256
0.910439	1.74662		1.2154							0.214325		0.417603
0.67468	1.24657		1.03309							0.190842		0.0716223
0.843854	1.56791		1.64079							0.0886276		0.162384
1.00911	1.37866		2.02567							0.203605		0.174676
0.622013	1.37878		0.810267							-0.0102063		0.405967
0.482398	1.15912		1.51925							0.0849868		0.474655
0.456474	1.38338		1.8231							0.157324		0.316739
0.437946	1.62061		1.64079							0.103749		0.2451
0.576614	0.31282		1.39771							-0.00792131		0.437295
0.875647	0.495013		2.00541							0.0678694		0.378303
0.671322	0.560782		1.33694							0.358923		0.344639
0.78262	0.616853		1.39771							0.231552		0.43686
0.5994	0.536783		1.15463							0.244032		0.449383
0.704012	0.426176		1.51925							0.368117		0.424841
0.767257	0.836166		1.33694							0.0816508		0.43598
0.653873	0.930837		1.58002							0.0821109		0.306193
0.484662	0.971649		1.51925							0.383565		0.310699
0.721992	0.757321		2.00541							0.274505		0.371547
0.577995	0.617782		1.15463							0.317755		0.339806
0.623614	0.595164		2.37003							0.157988		0.485375
0.512378	0.857016		1.09386							0.39353		0.358697
0.431631	0.947011		1.76233							0.189006		0.153278
0.625342	0.629007		1.58002							0.280489		0.240887
0.647303	0.394392		1.33694							0.251327		0.233029
0.960106	0.850019		1.46376							0.163778		0.273666
0.863654	0.962653		1.76871							0.366717		0.315836
1.13633	0.761329		1.95168							0.483346		0.451876
1.53588	0.612673		1.8297							0.213408		0.232796
1.02738	0.606831		0.97584							0.211709		0.160535
0.912729	0.777379		1.2198							0.0461587		0.226142
0.991809	0.883296		1.58574							0.146699		0.371585
0.611521	1.0542		1.95168							0.131191		0.159057
0.85369	0.735885		1.64673							0.00316346		0.239939
0.876167	0.555094		1.2198							-0.16658		0.283656
0.909753	0.470469		1.09782							0.140732		0.361142
1.13669	0.623836		1.15881							0.07333		0.134986
1.02038	0.670985		2.27696							0.181957		0.254972
0.970741	0.643753		1.89069							0.0723758		0.364654
0.747328	0.976813		1.70772							0.0559325		0.392935
0.602134	1.16671		1.64673							0.299478		0.12056
0.511905	0.792503		1.15881							0.217171		0
0.777674	1.2846		2.56158							0.264524		0.422305
0.476158	0.966817		1.03683							0.196279		0
0.448583	0.94738		1.28079							0.225355		0.413021
0.527953	1.21637		2.25663							0.183535		0.413086
0.94581	1.17785		2.19564							0.23199		0
0.527133	1.16788		1.46376							0.10753
0.548715	1.91295		2.19564							0.329999
0.553892	1.25913		2.56158							0.356964
0.72388	1.38277		2.37861							0.0124212
0.648597	1.3849		2.25663							-0.0241595
1.22019	1.5624		1.76871							0.189526
1.01604	1.31415		0.91485							0.189328
1.39265	1.56634		1.70772							0.335279
1.51197	5.94436		1.8297							0.0732242
1.73156	5.03028		1.58574							0.214382
1.73512	5.17888		1.34178							0.256744
1.55973	5.93115		1.03683							-0.0814582
1.61451	4.75687		1.8297							0.209328
1.64466	4.35231		2.19564							0.0541091
1.25553	5.59561		2.2363							-0.0597474
1.04389	3.27446		1.2947							0.286668
1.14282	0.438263		1.7655							0.147222
1.23322	0.238593		1.35355							-0.164054
0.510061	0.793012		1.4124							0.0499611
0.436146	0.406703		1.7655							0.119055
0.322152	0.945215		2.1186							0.0981523
0.339161	0.534624		2.0009							0.167765
0.571434	0.47294		2.0009							0.246252
0.542536	0.270337		1.5301							0.0694011
0.624133	1.11104		1.94205							0.0506367
0.458619	1.20784		2.1186							0.244366
0.375511	0.796887		1.5301							0.065775
0.408189	0.910203		1.8832							0.359483
0.516558	0.664611		2.4717							0.203739
2.1529	0.784344		1.8832							0.229259
2.50103	0.959115		1.82435							0.117882
2.71572	0.873829		1.5301							-0.0421221
3.2683	0.790205		1.82435							0.043724
2.99103	0.847634		2.0009							0.273884
2.84253	0.774162		2.0009							0.332571
2.62628	0.551124		1.7655							0.322971
2.01753	0.728254		1.177							0.214808
2.36582	1.07434		1.47125							0.34227
2.37101	1.48919		1.7655							0.304884
0.591382	1.58848		2.05975							0.381589
0.3187	1.44998		2.29515							0.2162
0.243161	1.29312		1.70665							0.0521894
0.318455	1.26568		1.8832							-0.0972592
0.376876	1.00893		1.7655							0.2922
1.05883	1.37488		1.47125							0.243102
0.769	1.66358		1.6478							0.282964
0.412852	1.66869		2.0009							0.233138
0.299781	1.6794		1.58895							0.274222
0.212037	1.61615		1.0593							0.308846
0.365498	1.53148		1.2947							-0.0615863
1.08613	1.30438		1.6478							0.280805
0.426722	1.33142		1.00045							0.0872334
0.261014	1.31167		1.47125							0.148576
0.288454	1.15529		1.35355							0.254532
0.412293	1.45936		1.4124							0.328115
0.450718	1.54539		1.23585							0.302809
0.893423	1.60296		1.56933							0.12744
0.777453	1.49628		1.70665							0.0338446
0.429028	1.43893		1.7655							0.155934
0.364529	1.51069		2.0009							0.173007
0.587669	1.56275		1.6478							0.311484
1.07141	1.32543		1.58895							0.23084
0.435726	1.40008		2.354							0.35008
0.427284	1.09825		1.7655							0.1966
1.00389	1.22613		2.1186							0.192336
1.01313	1.27726		2.41285							0.0638183
1.60644	1.22411		1.8832							0.377912
0.42515	1.23955		2.24808							0.171257
2.44041	1.31233		1.81424							0.232008
1.45452	1.38853		1.89312							0.298418
1.20784	0.437722		2.24808							0.1936
1.09649	0.226175		2.18892							0.28469
0.480647	0.201123		1.65648							0.165047
0.809469	0.201691		0.94656							0.398661
1.59766	0.22357		1.5162							0.0277495
1.65987	0.321313		1.61595							0.00337816
1.59381	0.307685		1.9152							0.0707589
0.205522	0.304968		1.25685							-0.0145691
0.278015	5.69912		1.97505							0.223899
0.211616	5.17137		0.4788							0.370971
0.36081	4.85057		1.73565							0.277991
0.229372	4.66832		1.7955							0.25496
0.275544	4.36331		0.89775							0.135301
0.308363	3.04868		1.0773							0.0711041
0.21668	3.69878		0.4788							0.124625
0.231246	2.69057		1.0773							0.278637
0.203335	3.66938		2.21445							0.198661
0.261714	3.58724		1.9152							0.174611
0.21159	4.42475		0.77805							0.197318
0.286944	4.22955		1.37655							0.0412963
0.278523	5.03695		1.9152							0.011814
0.228296	4.43979		1.0374							0.391786
0.31976	5.65244		0.798							0.282901
0.213947	3.84595		1.13715							0.040378
0.283905	2.60161		0.65835							0.0241282
0.208376	1.96324		0.7546							0.280103
0.236395	2.94326		0.8085							0.0768094
0.229879	2.48849		0.7546							0.0903583
0.243238	2.78132		1.0241							0.46793
0.251507	2.60906		0.2156							0.224748
0.23113	2.63642		0.7546							0.130044
0.225434	2.31125		0.9163							0.207781
0.211011	2.46739		0.8624							0.241305
0.270456	2.42153		1.95624							0.214922
0.213603	2.66931		2.54904							0.284326
0.239377	2.63725		2.60832							0.079313
0.284907	2.63369		1.95624							0.177353
0.221392	2.57091		2.6676							0.21851
0.329655	2.8304		2.6676							0.173602
0.224886	1.36279		2.21778							0.282171
0.216564	1.68781		2.34099							0.495039
0.606403	2.59655		2.15618							0.36479
0.561862	2.33699		2.09457							0.0100818
0.513038	3.20115		1.97136							0.197151
0.626496	2.95214		1.78655							0.185018
0.418963	3.6238		2.34099							0.186594
0.438214	3.16607		1.90976							0.260045
0.625343	3.29574		1.47852							0.30762
0.359168	4.48605		1.90976							0.353332
0.340768	4.06697		1.66334							0.47755
0.714754	5.74856		1.84815							0.184203
0.584742	5.22031		1.84815							0.0797282
0.476142	4.37198		1.66334							0.30854
0.473475	4.69431		1.78655							0.137681
0.481332	4.17559		2.09457							0.206963
0.405109	3.57275		2.34099							0.427195
0.445905	3.73035		1.72494							0.362188
0.333166	2.97824		2.03296							0.149548
0.323479	2.25301		1.40392							0.377589
0.481786	3.78051		1.15976							0.0560645
0.453979	1.01165		1.34288							0.240429
0.483958	4.19844		1.77016							-0.00825713
0.402794	4.54156		1.52375							0.373388
0.463368	3.72372		1.88945							0.150187
0.400006	2.58877		1.40185							0.457842
0.406362	1.87235		0.79235							0.123566
0.620367	2.92668		1.40185							0.458817
0.341265	2.55655		1.9504							0.12171
0.476717	1.47329		1.219							0.457034
0.383329	2.73301		0.568867							0.205181
0.435213	3.66766		1.30027							0.452538
0.495881	4.46412		1.62533							0.41352
0.505908	3.27		0.2438							0.138916
0.657663	2.16595		0.7314							0.245633
0.516225	1.71088		1.52375							-0.106542
0.737978	2.07737		1.8414							0.422368
0.488268	2.28516		1.3662							0.316307
0.483134	1.66292		1.3068							0.458637
0.483733	2.32225		1.6632							0.369693
0.466555	2.727		2.079							0.467706
0.469554	3.37607		1.3662							0.446464
0.356079	2.27795									0.344291
0.426426	1.75418									0.160274
0.686266	0.967754									0.460219
0.473783	0.99957									0.179379
0.772988	1.55694									0.19828
0.643906	1.6548									0.244835
0.67942	0.785204									0.0405737
0.501288	1.25103									0.225041
0.411018	0.496893									0.00330118
0.7504	0.555231									0.299434
0.508169	0.501116									0.171009
0.66735	0.450868									0.171894
0.602359	0.499487									0.037976
0.650942	0.492696									0.45888
0.6055	0.516806									0.442694
0.460857	0.593667									0.217064
0.395836	0.582297									0.403424
0.413029	0.709637									-0.0294853
0.238968	0.633991									0.254434
0.297993	0.753127									0.287648
0.355446	0.629571									0.463462
0.475384	0.858364									0.454794
0.496407	0.69948									0.297726
0.229637	0.825252									0.0649883
0.279859	0.703887									0.140947
0.332227	2.78981									0.223123
0.200186	3.29175									-0.0307268
0.458017	2.87612									-0.0648679
0.300126	3.12734									-0.0740182
0.229188	2.2947									0.407361
0.356796	2.01174									0.323029
0.226151	1.56536									0.133608
0.382919	1.31385									0.209974
0.333452	1.23113									0.289629
0.233357	1.11453									0.185256
0.208199	1.24744									0.0624548
0.260373	1.32472									0.424099
0.550439	1.15018									0.024732
0.300063	1.42048									0.467737
0.273535	1.19906									0.297012
0.224142	1.17034									-0.0162918
0.317753	1.14343									0.284118
0.513302	1.14396									-0.0294318
0.323704	1.24627									0.411202
0.384972	1.22288									0.296987
0.220013	1.27665									0.183824
0.200206	3.15292									0.28075
0.304266	3.7669									0.298741
0.292705	2.77102									0.204909
0.544864	2.47675									0.230373
0.313528	3.72437									0
0.363265	3.10488									-0.0309929
0.271982	2.49186									0
0.331877	3.17691									0.337844
0.398262	2.88611									0.107737
0.290428	3.28499									0.0468902
0.296688	2.84987									0.0556641
0.296804	2.40376									0.0655483
0.957192	2.35261									0.0427462
1.68213	3.01963									0.00471391
0.537818	3.14547									0.120016
0.674322	2.93765									0.0947087
0.580944	2.95528									0.122088
0.551054	2.83344									0.00349589
0.803216	2.693									0.104934
1.06017	2.93066									0.255303
0.463348	2.41751									0.0792166
1.67298	3.28779									0.326059
0.742686	3.41785									0.35208
0.662559	2.57389									0.147153
0.639931	2.51644									0.295684
0.478109	2.83213									0.476276
0.565251	2.86019									-0.0619495
0.622598	3.28541									0.203038
0.614503	2.99874									0.146958
0.632435	2.64205									0.0492497
0.588298	2.80745									0.117896
0.658007	0.833789									0.228065
0.565938	2.2451									0.254627
0.734381	2.07874									0.479182
0.504528	2.53161									0.245726
0.691085	3.09804									0.339382
0.639703	3.8873									0.405604
0.658321	4.87379									0.159248
0.536756	4.09689									0.135915
0.577811	2.30182									0.142799
0.748077	4.36349									0.0470582
0.814768	3.12459									0.272417
0.824843	1.91474									0.126875
0.726497	1.89503									0.352486
0.764486	3.68482									0.205937
1.12751	4.85413									0.0375975
1.7518	4.17258									0.197656
0.515865	4.13147									0.474903
0.999448	3.25798									0.0229178
0.772149	1.71355									0.0170238
0.668148	0.514609									0.254338
0.545493	5.35529									0.145349
0.642205	3.91959									0.447267
0.620137	2.38692									0.32695
0.660209	2.8658									0.164557
0.467463	3.99202									0.139566
0.429237	3.11581									0.105066
0.4151	3.03886									0.438164
0.403034	2.61617									0.462703
0.592196	2.62412									-0.00848928
0.596321	2.18435									0.0197074
0.523143	1.53906									0.221611
0.258511	1.71035									0.202558
0.485859	3.71023									0.300984
0.360144	3.63296									0.0867412
0.397497	3.05718									0.220306
0.486093	4.07389									0.204221
0.652766	2.81443									0.14708
0.710707	1.9288									0.087984
0.652248	1.99657									-0.00585329
0.630184	2.18813									0.171508
0.738742	2.5028									0.19718
0.719821	1.88406									0.182698
0.83032	1.41217									0.426051
0.871709	1.50307									0.319702
0.784924	2.86159									0.202526
0.623251	3.65431									0.191675
0.589179	3.59993									0.105439
0.266218	2.29309									0.134032
0.373806	2.159									0.178245
0.395823	2.20797									0.359251
0.535833	2.11689									0.289368
0.391906	2.03995									0.158069
0.444429	0.607269									0.151775
0.889776	3.92443									0.354675
0.850584	3.71985									0.359122
0.664827	2.22389									0.329447
0.410778	1.87701									0.343108
0.612984	1.66866									0.296816
0.528186	1.30637									0.246379
0.45838	1.01892									0.158789
0.451526	0.764726									0.185858
0.362476	0.903907									0.347622
0.474076	0.816485									0
0.357409	0.768918									0.281984
0.377356	2.80687									0.332278
0.574101	3.04147									0.124592
0.814452	2.02969									-0.00502895
0.780338	1.59662									0.412031
0.590897	1.16504									0.0366978
0.339715	1.02384									0.297194
0.390264	0.914166									0.36451
0.450512	0.906007									0.4372
0.491291	0.831151									0.0721021
0.351968	0.926765									-0.0832365
0.283587	0.610847									-0.00156614
0.515583	0.834947									0.109136
0.780794	0.887523									0.314177
0.599339	0.734332									0.418327
0.33045	0.870918									0.378195
0.54552	0.819609									0.0390304
0.498563	0.806286									0.383801
0.450509	0.916814									0.382293
0.436525	0.99374									0.192422
0.413418	2.17626									0.298171
0.393762	5.18283									0.299763
0.288046	4.18646									0.163302
0.646183	2.41765									-0.142409
0.829044	2.23041									0.0759665
0.550154	5.03993									0.284123
0.517999	4.67402									0.162437
0.58786	2.48937									0.173948
0.548949	2.52672									-0.0141324
0.575089	4.25762									0.270454
0.475731	4.03949									0.0841097
0.44417	2.13144									0.0927898
0.27609	2.20226									0.490803
0.405804	1.53382									0.382999
0.632287	4.10939									0.274268
0.596528	2.16214									0.232108
0.55566	2.37981									0.154499
0.424433	4.80598									0.104117
0.497001	5.86881									0.314516
0.482038	2.68967									0.254296
0.56029	2.70768									0.320605
0.550656	2.59131									0.345286
0.551831	2.30168									-0.0109232
0.393076	3.12635									0.146677
0.363775										0.176933
0.277419										0.243918
0.561578										0.105265
0.745472										0.315849
0.451745										0.162501
0.393835										0.187768
0.530937										0.0642491
0.461208										0.104164
0.535848										-0.036188
0.51382										-0.0444988
0.513773
0.477252
0.482494
0.321037
0.278536
0.298645
0.360799
0.248391
0.462416
0.32098
0.413968
0.435527
0.276203
0.451682
0.493977
0.383099
0.27217
0.293927
0.232075
3.02355
1.13622
1.79479
1.56921
1.7376
2.38124
2.20878
2.56071
3.16481
2.85195
2.24102
1.34831
1.49262
1.63506
1.65735
1.35334
2.12662
1.16842
0.550485
0.600427
0.603022
0.614813
0.609523
0.579646
0.571646
0.606047
0.678998
0.529193
0.644022
0.467247
0.861065
1.2525
1.56977
0.933104
0.722264
0.740131
0.722793
0.53649
0.540823
0.481203
0.557327
0.361277
0.425787
0.621428
0.634407
0.507788
0.559102
0.569927
0.415817
2.48836
2.20885
2.30784
1.87549
0.913772
0.7166
1.94046
0.9921
1.17545
1.78605
1.94712
1.51465
1.2503
1.14228
1.49888
1.71148
1.55933
1.3988
1.18676
1.08112
1.44605
1.9818
1.28938
1.34311
1.03912
0.910373

## Sheet: Fig S6
Fig S6D	bhlhe22/bhlhe23 sgRNA of Tg(ptf1a:EGFP), in single section=30×100 μm2(W×H) tangential area
Cell number	Fish	PRs	HCs	BPs/MCs	RGCs
bhlhe22/bhlhe23 sgRNA(bhlhe22+/bhlhe23+ Ac-ablated)	Fish 1	18	9	32	23
	Fish 2	21	8	33	19
	Fish 3	17	9	34	22
	Fish 4	18	9	31	22
	Fish 5	20	9	35	20
	Fish 6	19	7	32	18
	Fish 7	20	7	32	17
	Fish 8	22	9	31	21
	Fish 9	21	9	30	17
control sgRNA	Fish 1	16	8	46	18
	Fish 2	21	7	36	13
	Fish 3	21	10	40	13
	Fish 4	19	11	35	20
	Fish 5	20	8	33	15
	Fish 6	20	9	35	22
	Fish 7	22	6	37	23
	Fish 8	21	8	34	19
Fig S6F	MTZ treated TgBAC(sox2:gal4ff;uas:nfsB-mCherry), in single section=30×100 μm2(W×H) tangential area
Cell number	Fish	PRs	HCs	BPs/MCs	RGCs
MTZ(sox2+/isl1+ AC-ablated)	Fish 1	13	5	32	27
	Fish 2	17	5	27	25
	Fish 3	20	6	38	29
control	Fish 1	14	7	25	26
	Fish 2	27	5	25	47
	Fish 3	14	7	24	27
Fig S6H	bhlhe22/bhlhe23 sgRNA of wildtype(AB, 5 dpf), in single section=100×100 μm2(W×H) tangential area
Cell number	Fish	GS+ cells
bhlhe22/bhlhe23 sgRNA(bhlhe22+ AC-ablated)	Fish 1	14
	Fish 2	12
	Fish 3	13
	Fish 4	14
	Fish 5	10
	Fish 6	14
	Fish 7	13
	Fish 8	16
	Fish 9	14
	Fish 10	17
	Fish 11	14
	Fish 12	14
control sgRNA	Fish 1	13
	Fish 2	12
	Fish 3	12
	Fish 4	15
	Fish 5	15
	Fish 6	18
Fig S6J	MTZ treated TgBAC(sox2:gal4ff;uas:nfsB-mCherry) labeling with MC marker anti-GS, in single section=100×100 μm2(W×H) tangential area
Cell number	Fish	GS+ cells	sox2+ ACs
MTZ(sox2+ AC-ablated)	Fish 1	10	0
	Fish 2	10	1
	Fish 3	9	3
	Fish 4	13	5
	Fish 5	10	9
	Fish 6	14	4
	Fish 7	11	0
	Fish 8	13	3
	Fish 9	10	0
	Fish 10	8	3
	Fish 11	12	5
control	Fish 1	9	12
	Fish 2	12	18
	Fish 3	11	10
	Fish 4	13	16
	Fish 5	17	21
	Fish 6	8	20
	Fish 7	13	17

[truncated: 1 more sheets: Fig S7]
